# Supplementary material for: Linking Labile Heme with Thrombosis
Source: PubMed Central journal article supplement (PMC7865584; doi:10.3390/jcm10030427), 2021-01-22
Supplement: jcm-10-00427-s001.pdf [file jcm-10-00427-s001.pdf]

Supplementary Materials

## Linking labile heme with thrombosis

Marie-Thérèse Hopp <sup>1</sup> and Diana Imhof <sup>1,\*</sup>

<sup>1</sup> Pharmaceutical Biochemistry and Bioanalytics, University of Bonn, An der Immenburg 4, 53121 Bonn, Germany; mhopp@uni-bonn.de (M.H.); dimhof@uni-bonn.de (D.I.)

\* Correspondence: dimhof@uni-bonn.de

Received: date; Accepted: date; Published: date

### Supplementary tables

Supplementary table S1. Overview of side effects observed after heme injection.

| Observed side effect                                                           | Organism           | Compound       | Solvent                                                           | Dose                                                           | Injection                                  | Effect                                                                                | Reference                   |
|--------------------------------------------------------------------------------|--------------------|----------------|-------------------------------------------------------------------|----------------------------------------------------------------|--------------------------------------------|---------------------------------------------------------------------------------------|-----------------------------|
| Ecchymosis, hemorrhage                                                         | Guinea pig, rabbit | Hematin, hemin | 0.85% salt solution                                               | 30 - 54 mg/kg                                                  | intraperitoneal, subcutaneous, intravenous |    | Brown 1911 [1]              |
| Hemorrhage                                                                     | Cat, dog           | Hematin        | 0.85% NaCl + 2% Na <sub>2</sub> CO <sub>3</sub> alkaline solution | 3.5 - 9 mg/kg                                                  | intraperitoneal, visceral                  |    | Brown & Loevenhart 1913 [2] |
| Hemorrhagic kidney injury, hemorrhage, anemia                                  | Rabbit             | Hematin        | 0.85% NaCl + 2% Na <sub>2</sub> CO <sub>3</sub> alkaline solution | 25 mg/kg                                                       | intravenous                                |  | Brown 1913 [3]              |
| Hemorrhage, hyaline thrombi, emboli, vaso-occlusion, vascular injury, infarcts | Rabbit             | Hematin        | 0.85% NaCl + 2% Na <sub>2</sub> CO <sub>3</sub> alkaline solution | 10 - 25 mg/kg                                                  | intravenous                                |  | Brown 1913 [4]              |
| Hemorrhages, thromboses, infarctions                                           | Dog                | Hematin        | disodium buffer, pH 7.6                                           | N/A (intravenous), 200 mg (intraperitoneal, 3 x weekly), 20 mg | intravenous, intraperitoneal, subcutaneous |  | Anderson et al. 1942 [5]    |

|                                                                                                                              |                                              |                            |                                                                               |                                                                   |             |                                                                                       |                             |
|------------------------------------------------------------------------------------------------------------------------------|----------------------------------------------|----------------------------|-------------------------------------------------------------------------------|-------------------------------------------------------------------|-------------|---------------------------------------------------------------------------------------|-----------------------------|
| Inhibition of clotting mechanism                                                                                             | Dog                                          | Hematin                    | physiological saline, sodium salt solution                                    | (subcutaneous, 5 x in a period of 1-2 weeks)<br>14.5 - 32.6 mg/kg | intravenous |    | Corcoran & Page 1945 [6]    |
| Massive hemorrhagic bleeding, bleeding out of every body orifice                                                             | Rat                                          | Hematin                    | isotonic Na <sub>2</sub> CO <sub>3</sub> solution                             | 100 - 180 mg/kg                                                   | intravenous |    | Gessler et al. 1966 [7]     |
| Thrombophlebitis                                                                                                             | Human (hepatic porphyria patients)           | Hematin                    | 0.25% Na <sub>2</sub> CO <sub>3</sub> , pH 8.0; diluted in physiologic saline | 1.2 - 6 mg/kg (applied as 4.3 - 108 mg/l, daily)                  | intravenous |    | Dhar et al. 1975 [8]        |
| Internal bleeding, bleeding into small intestine and petechiae of liver, lungs, adrenals, hemorrhage, subcutaneous hematomas | Rat                                          | Hemin                      | 1% Na <sub>2</sub> CO <sub>3</sub>                                            | 40 - 60 mg/kg                                                     | intravenous |    | Lips et al. 1978 [9]        |
| Chemical phlebitis                                                                                                           | Human (AIP patients)                         | Hematin                    | saline solution                                                               | 1.8 - 3.7 mg/kg (applied as 2 mg/ml, daily)                       | intravenous |    | Lamon et al. 1979 [10]      |
| Thrombophlebitis                                                                                                             | Human (AIP patient)                          | Hematin                    | N/A                                                                           | 196 mg, every 12 hours                                            | intravenous |    | Morris et al. 1981 [11]     |
| Phlebitis                                                                                                                    | Human (AIP patients)                         | Hematin                    | 1% Na <sub>2</sub> CO <sub>3</sub>                                            | 4 mg/kg (every 12 hours or daily)                                 | intravenous |   | McColl et al. 1981 [12]     |
| Bile thrombi                                                                                                                 | Human (Protoporphyrin patients)              | Hematin                    | 0.25% Na <sub>2</sub> CO <sub>3</sub> , pH 8.0; diluted in physiologic saline | 3 - 4 mg/kg                                                       | intravenous |  | Bloomer & Pierach 1982 [13] |
| Occasional thrombophlebitis                                                                                                  | Human (AIP and variegate porphyria patients) | Heme arginate (Normosang®) | N/A                                                                           | 2 - 3 mg/kg (applied as 25 mg/ml, repetitive)                     | intravenous |  | Mustajoki et al. 1986 [14]  |

|                                                   |                                           |                            |                                                           |                                               |             |   |                              |
|---------------------------------------------------|-------------------------------------------|----------------------------|-----------------------------------------------------------|-----------------------------------------------|-------------|---|------------------------------|
| Occasional bleedings                              | Human (myelodysplastic syndrome patients) | Heme arginate (Normosang®) | 0.9% saline solution                                      | 2 - 3 mg/kg (applied as 25 mg/ml, repetitive) | intravenous | 🔴 | Ruutu et al. 1987 [15]       |
| Thrombophlebitis                                  | Rabbit                                    | Hematin (Panhematin®)      | aqueous solution with 40% 1,2-propanediol and 10% ethanol | 5 mg/kg (applied as 25 mg/ml, repetitive)     | intravenous | 🌸 | Tenhunen et al. 1987 [16]    |
| Thrombophlebitis, fibrotic events, vaso-occlusion | Human (healthy)                           | Hematin (Panhematin®)      | 0.05 M Na <sub>2</sub> CO <sub>3</sub> , 0.04 M sorbitol  | 4 mg/kg                                       | intravenous | 🌸 | Simionatto et al. 1988 [17]  |
| Phlebitis                                         | Human (AIP patients)                      | Heme arginate (Normosang®) | 0.9% NaCl                                                 | 3 mg/kg                                       | intravenous | 🌸 | Herrick et al. 1989 [18]     |
| Occasional thrombophlebitis                       | Human (AIP patients)                      | Heme arginate (Normosang®) | physiological saline                                      | 3 mg/kg (Finland), 250 mg (France)            | intravenous | 🌸 | Mustajoki et al. 1993 [19]   |
| Coagulopathy, hematoma                            | Human (AIP patient)                       | Hematin (Panhematin®)      | 0.05 M Na <sub>2</sub> CO <sub>3</sub> , 0.04 M sorbitol  | 4 mg/kg                                       | intravenous | 🔴 | Gajra et al. 2000 [20]       |
| Thrombotic complications                          | Human (acute porphyria patients)          | Hematin (Panhematin®)      | 0.05 M Na <sub>2</sub> CO <sub>3</sub> , 0.04 M sorbitol  | < 2 - > 6 mg/kg                               | intravenous | 🌸 | Anderson & Collins 2006 [21] |
| Thrombosis                                        | Human (acute porphyria patients)          | Heme arginate (Normosang®) | N/A                                                       | 3 mg/kg (applied as 25 mg/ml, repetitive)     | intravenous | 🌸 | Marsden et al. 2015 [22]     |

🔴 = Evidence for a tendency to an anticoagulant effect of heme and its formulations. 🌸 = Evidence for a tendency to a procoagulant effect of heme and its formulations.

Supplementary table S2. Overview of heme effects on bleeding and clotting times.

| Parameter | Organism            | Compound              | Solvent                                                 | Dose                    | Injection         | Setting         | Baseline [s]             | Monitored time [s]        | Change                            | Effect | Reference               |
|-----------|---------------------|-----------------------|---------------------------------------------------------|-------------------------|-------------------|-----------------|--------------------------|---------------------------|-----------------------------------|--------|-------------------------|
| aPTT      | Human (AIP patient) | Hematin               | N/A                                                     | 196 mg, every 12 hours  | intravenous       | Case report     | 25-41                    | > 60 <sup>a</sup>         | > x1.5                            | 🔴      | Morris et al. 1981 [11] |
| aPTT      | Human (AIP patient) | Hematin               | N/A                                                     | 4 mg/kg, every 12 hours | intravenous       | Case report     | 37.5                     | >150 <sup>b</sup>         | > x4.0                            | 🔴      | Glueck et al. 1983 [23] |
| aPTT      | Human (AIP patient) | Hematin               | N/A                                                     | 4 mg/kg                 | intravenous       | <i>in vivo</i>  | ~30                      | ~100 <sup>c</sup>         | ~ x3.3                            | 🔴      | Glueck et al. 1983 [23] |
| (a)PTT    | Human               | Hematin               | 0.1 N NaOH, diluted in PBS                              | 3 nmol                  | - (plasma sample) | <i>in vitro</i> | 461                      | 323                       | ~30% ↓                            | 🌀      | Becker et al. 1985 [24] |
| aPTT      | Human               | Hematin               | 1 N NaOH, diluted in potassium phosphat buffer (pH 7.5) | 60 µg/ml                | - (plasma sample) | <i>in vitro</i> | 37.4 (0 h) - 35.8 (50 d) | 40.9 (0 h) - 103.1 (50 d) | ≤ x2.9 (aged hematin exclusively) | -/🔴    | Jones 1986 [25]         |
| aPTT      | Human               | Hematin               | 1 N sodium carbonate (pH 7.5))                          | 60 µg/ml                | - (plasma sample) | <i>in vitro</i> | 37.4 (0 h) - 35.8 (50 d) | 39.8 (0 h) - 183.0 (50 d) | ≤ x4.6 (aged hematin exclusively) | -/🔴    | Jones 1986 [25]         |
| aPTT      | Human               | Hematin (Panhematin®) | water                                                   | 78 µg/ml                | - (plasma sample) | <i>in vitro</i> | N/A                      | N/A                       | x1.4                              | 🔴      | Jones 1986 [25]         |
| aPTT      | Rat                 | Hematin               | 1 N sodium carbonate (pH 7.5))                          | 12 mg/kg                | intravenous       | <i>in vivo</i>  | 17.3                     | N/A                       | ~ x1.8 (3 min after injection)    | 🔴      | Jones 1986 [25]         |

|      |                      |                                            |                                                          |          |                        |                 |       |                                                                                                 |                                                             |   |                             |
|------|----------------------|--------------------------------------------|----------------------------------------------------------|----------|------------------------|-----------------|-------|-------------------------------------------------------------------------------------------------|-------------------------------------------------------------|---|-----------------------------|
| aPTT | Human                | Heme arginate (Normosang®)                 | aqueous solution + 40% 1,2-propanediol + 10% ethanol     | 3 mg/kg  | intravenous            | <i>in vivo</i>  | ~34.5 | ~34.3 <sup>d,e</sup>                                                                            | No significant change                                       | - | Tenhunen et al. 1987 [16]   |
| aPTT | Human                | Heme arginate (Normosang®)                 | physiological saline                                     | 3 mg/kg  | intravenous            | <i>in vivo</i>  | ~35.0 | ~33.0 - 36.0 <sup>f</sup>                                                                       | No significant change                                       | - | Volin et al. 1988 [26]      |
| aPTT | Human                | Hematin (Panhematin®)                      | 0.05 M Na <sub>2</sub> CO <sub>3</sub> , 0.04 M sorbitol | 4 mg/kg  | intravenous            | <i>in vivo</i>  | N/A   | N/A                                                                                             | ~ x1.2                                                      | 🔴 | Simionatto et al. 1988 [17] |
| aPTT | Human                | Hematin (Panhematin®)                      | 0.05 M Na <sub>2</sub> CO <sub>3</sub> , 0.04 M sorbitol | 70 µg/ml | - (plasma sample)      | <i>in vitro</i> | N/A   | N/A                                                                                             | ~ x1.3                                                      | 🔴 | Simionatto et al. 1988 [17] |
| aPTT | Human (AIP patients) | Heme arginate (Normosang®)                 | 0.9% NaCl                                                | 3 mg/kg  | intravenous            | <i>in vivo</i>  | N/A   | N/A                                                                                             | No significant change                                       | - | Herrick et al. 1989 [18]    |
| aPTT | Human (AIP patient)  | Hematin (Panhematin®)                      | 0.05 M Na <sub>2</sub> CO <sub>3</sub> , 0.04 M sorbitol | 4 mg/kg  | intravenous            | Case report     | 27    | 28 (1 hour after 1 <sup>st</sup> injection), 33 (1 hour after 2 <sup>nd</sup> injection, day 4) | If, only very slight change after 2 <sup>nd</sup> injection | - | Green & Ts'ao 1990 [27]     |
| aPTT | Human (AIP patient)  | Hematin (Panhematin®)                      | 0.05 M Na <sub>2</sub> CO <sub>3</sub> , 0.04 M sorbitol | 4 mg/kg  | intravenous            | Case report     | 35.6  | 58.3                                                                                            | ~ x1.6                                                      | 🔴 | Gajra et al. 2000 [20]      |
| aPTT | Rat                  | Albumin-heme (50 g/l & 3 mM, respectively) | 0.9% NaCl, pH 7.4                                        | 10 - 44% | - (whole blood sample) | <i>in vitro</i> | ~30.0 | ~30.0                                                                                           | No significant change                                       | - | Huang et al. 2003 [28]      |

|                                    |                |                           |                                                                            |               |                      |                 |        |                                    |                             |   |                                   |
|------------------------------------|----------------|---------------------------|----------------------------------------------------------------------------|---------------|----------------------|-----------------|--------|------------------------------------|-----------------------------|---|-----------------------------------|
| aPTT                               | Rat            | Hemin                     | <0.5%<br>DMSO                                                              | 50<br>mg/kg   | intraperitoneal      | <i>in vivo</i>  | ~16.9  | ~17.8                              | No<br>significant<br>change | - | Desbwards<br>et al. 2007<br>[29]  |
| aPTT                               | Mouse<br>(CLP) | Hemin                     | DMSO,<br>diluted in<br>PBS                                                 | 50<br>μmol/kg | intraperitoneal      | <i>in vivo</i>  | ~19.0  | ~22.0                              | ~x1.2                       | 💧 | Fei et al.<br>2012 [30]           |
| aPTT                               | Mouse<br>(CLP) | Hemin                     | DMSO,<br>diluted in<br>PBS                                                 | 50<br>μmol/kg | intraperitoneal      | <i>in vivo</i>  | ~9.2   | ~15.6                              | ~x1.7                       | 💧 | Hassaan et<br>al. 2015<br>[31]    |
| aPTT                               | Human          | Hemin                     | 0.03 M<br>NaOH,<br>diluted in<br>DPBS                                      | 1 - 100<br>μM | - (plasma<br>sample) | <i>in vitro</i> | ~31.3  | ~36.7 (1<br>μM) – 41.4<br>(100 μM) | No<br>significant<br>change | - | Hopp et<br>al. 2020<br>[32]       |
| aPTT                               | Human          | Hemin +<br>albumin (0.1%) | 0.03 M<br>NaOH,<br>diluted in<br>DPBS                                      | 1 - 100<br>μM | - (plasma<br>sample) | <i>in vitro</i> | ~32.0  | ~32.9 (1<br>μM) - 33.7<br>(100 μM) | No<br>significant<br>change | - | Hopp et<br>al. 2020<br>[32]       |
| <b>Bleeding<br/>time (Duke)</b>    | Rabbit         | Hematin                   | 0.85% NaCl +<br>2% Na <sub>2</sub> CO <sub>3</sub><br>alkaline<br>solution | 25<br>mg/kg   | intravenous          | <i>in vivo</i>  | n.d.   | > 7200                             | n.d.                        | 💧 | Brown<br>1913 [3]                 |
| <b>Clotting<br/>time</b>           | Rat            | Hemin                     | <0.05%<br>DMSO                                                             | 50<br>mg/kg   | intraperitoneal      | <i>in vivo</i>  | ~600   | ~2400                              | ~x4.0                       | 💧 | Rocheffort<br>et al. 2007<br>[33] |
| Clotting<br>time                   | Human          | Hemin                     | 0.1 M NaOH,<br>adjusted to<br>pH 7.4                                       | 30 μM         | - (whole<br>blood)   | <i>ex vivo</i>  | ~500   | ~400                               | ~20% ↓                      | 🌸 | De Souza<br>et al. 2017<br>[34]   |
| <b>Clot<br/>formation<br/>time</b> | Human          | Hemin                     | 0.1 M NaOH,<br>adjusted to<br>pH 7.4                                       | 30 μM         | - (whole<br>blood)   | <i>ex vivo</i>  | ~200   | ~150                               | ~25% ↓                      | 🌸 | De Souza<br>et al. 2017<br>[34]   |
| <b>Coagulation<br/>time</b>        | Rabbit         | Hematin                   | 0.85% NaCl +<br>2% Na <sub>2</sub> CO <sub>3</sub>                         | 25<br>mg/kg   | intravenous          | <i>in vivo</i>  | 8 - 11 | 17                                 | ~x1.8                       | 💧 | Brown<br>1913 [3]                 |

|                             |                                          |                               |                                                                      |                                  |                      |                 |                                |                             |                                         |     |                                 |
|-----------------------------|------------------------------------------|-------------------------------|----------------------------------------------------------------------|----------------------------------|----------------------|-----------------|--------------------------------|-----------------------------|-----------------------------------------|-----|---------------------------------|
| <b>ECLT</b>                 | Human                                    | Hematin                       | alkaline solution<br>0.1 N NaOH,<br>diluted in<br>PBS                | 3 nmol                           | - (plasma<br>sample) | <i>in vitro</i> | ≥ 10800                        | 2400                        | ~78% ↓                                  | 🔴   | Becker et<br>al. 1985<br>[24]   |
| <b>Ethanol<br/>gelation</b> | Human                                    | Heme arginate<br>(Normosang®) | aqueous<br>solution +<br>40% 1,2-<br>propanediol<br>+ 10%<br>ethanol | 3 mg/kg                          | intravenous          | <i>in vivo</i>  | negative                       | negative <sup>d,e</sup>     | No<br>significant<br>change             | -   | Tenhunen<br>et al. 1987<br>[16] |
| Ethanol<br>gelation         | Human                                    | Heme arginate<br>(Normosang®) | Physiological<br>saline                                              | 3 mg/kg                          | intravenous          | <i>in vivo</i>  | negative                       | negative <sup>f</sup>       | No<br>significant<br>change             | -   | Volin et al.<br>1988 [26]       |
| <b>FT</b>                   | Human<br>(AIP<br>patient)                | Hematin<br>(Panhematin®)      | 0.05 M<br>Na <sub>2</sub> CO <sub>3</sub> , 0.04<br>M sorbitol       | 4 mg/kg                          | intravenous          | Case<br>report  | 15.5                           | 18.9                        | ~ x1.2                                  | 🔴   | Gajra et al.<br>2000 [20]       |
| <b>PT</b>                   | Human<br>(AIP<br>patient)                | Hematin                       | N/A                                                                  | 196 mg,<br>every 12<br>hours     | intravenous          | Case<br>report  | 13.2                           | 20.2 <sup>a</sup>           | ~ x1.5                                  | 🔴   | Morris et<br>al. 1981<br>[11]   |
| PT                          | Human<br>(AIP<br>patient)                | Hematin                       | N/A                                                                  | 4<br>mg/kg,<br>every 12<br>hours | intravenous          | Case<br>report  | 11.7                           | 18.3 <sup>b</sup>           | ~ x1.6                                  | 🔴   | Glueck et<br>al. 1983<br>[23]   |
| PT                          | Human<br>(Acute<br>porphyria<br>patient) | Hematin                       | N/A                                                                  | 4 mg/kg                          | intravenous          | <i>in vivo</i>  | ~4                             | ~10 <sup>c</sup>            | ~ x2.5                                  | 🔴   | Glueck et<br>al. 1983<br>[23]   |
| PT                          | Human                                    | Hematin                       | 1 N NaOH,<br>diluted in<br>potassium<br>phosphat                     | 60<br>µg/ml                      | - (plasma<br>sample) | <i>in vitro</i> | 13.0 (0<br>h) - 12.0<br>(50 d) | 13.6 (0 h) –<br>16.4 (50 d) | ≤ x1.4 (aged<br>hematin<br>exclusively) | -/🔴 | Jones 1986<br>[25]              |

|    |                     |                            |                                                          |          |                   |                 |                          |                                                                                                 |                                                             |     |                             |
|----|---------------------|----------------------------|----------------------------------------------------------|----------|-------------------|-----------------|--------------------------|-------------------------------------------------------------------------------------------------|-------------------------------------------------------------|-----|-----------------------------|
| PT | Human               | Hematin                    | buffer (pH 7.5)<br>1 N sodium carbonate (pH 7.5))        | 60 µg/ml | - (plasma sample) | <i>in vitro</i> | 13.0 (0 h) - 12.0 (50 d) | 12.8 (0 h) - 16.1 (50 d)                                                                        | ≤ x1.3 (aged hematin exclusively)                           | -/🔴 | Jones 1986 [25]             |
| PT | Human               | Hematin (fresh)            | 1 M Na <sub>2</sub> CO <sub>3</sub> , pH 8.0             | 40 mg/l  | - (plasma sample) | <i>in vitro</i> | ~13.7                    | ~13.3                                                                                           | No significant change                                       | -   | Goetsch & Bissell 1986 [35] |
| PT | Human               | Hematin (50 h aged, 21°C)  | 1 M Na <sub>2</sub> CO <sub>3</sub> , pH 8.0             | 40 mg/l  | - (plasma sample) | <i>in vitro</i> | ~13.7                    | ~16.3                                                                                           | ~ x1.2                                                      | 🔴   | Goetsch & Bissell 1986 [35] |
| PT | Human               | Heme arginate (Normosang®) | Aqueous solution + 40% 1,2-propanediol + 10% ethanol     | 3 mg/kg  | intravenous       | <i>in vivo</i>  | ~17.0                    | ~17.3 <sup>d</sup> , ~17.2 <sup>e</sup>                                                         | No significant change                                       | -   | Tenhunen et al. 1987 [16]   |
| PT | Human               | Heme arginate (Normosang®) | Physiological saline                                     | 3 mg/kg  | intravenous       | <i>in vivo</i>  | ~18.0                    | ~18.0 - 19.0 <sup>f</sup>                                                                       | No significant change                                       | -   | Volin et al. 1988 [26]      |
| PT | Human               | Hematin (Panhematin®)      | 0.05 M Na <sub>2</sub> CO <sub>3</sub> , 0.04 M sorbitol | 4 mg/kg  | intravenous       | <i>in vivo</i>  | N/A                      | N/A                                                                                             | ~ x1.2                                                      | 🔴   | Simionatto et al. 1988 [17] |
| PT | Human (AIP patient) | Hematin (Panhematin®)      | 0.05 M Na <sub>2</sub> CO <sub>3</sub> , 0.04 M sorbitol | 4 mg/kg  | intravenous       | Case report     | 12                       | 12 (1 hour after 1 <sup>st</sup> injection), 15 (1 hour after 2 <sup>nd</sup> injection, day 4) | If, only very slight change after 2 <sup>nd</sup> injection | -   | Green & Ts'ao 1990 [27]     |



|    |                                          |                                                     |                            |                                |                      |                 |       |                  |                                    |   |                                  |
|----|------------------------------------------|-----------------------------------------------------|----------------------------|--------------------------------|----------------------|-----------------|-------|------------------|------------------------------------|---|----------------------------------|
| PT | Rat                                      | Albumin-heme<br>(50 g/l & 3<br>mM,<br>respectively) | 0.9% NaCl,<br>pH 7.4       | 10 - 44%<br>(0.28 -<br>1.2 mM) | - (whole<br>blood)   | <i>in vitro</i> | ~20.0 | ~20.0            | No<br>significant<br>change        | - | Huang et<br>al. 2003<br>[28]     |
| PT | Rat                                      | Hemin                                               | < 0.5%<br>DMSO             | 50<br>mg/kg                    | intraperitoneal      | <i>in vivo</i>  | ~19.3 | ~20.0            | No<br>significant<br>change        | - | Desbuards<br>et al. 2007<br>[29] |
| PT | Mouse<br>(CLP)                           | Hemin                                               | DMSO,<br>diluted in<br>PBS | 50<br>$\mu$ mol/kg             | intraperitoneal      | <i>in vivo</i>  | ~9.0  | ~11.0            | ~ x1.2                             | 💧 | Fei et al.<br>2012 [30]          |
| PT | Mouse<br>(CLP)                           | Hemin                                               | DMSO,<br>diluted in<br>PBS | 50<br>$\mu$ mol/kg             | intraperitoneal      | <i>in vivo</i>  | ~13.6 | ~18.6            | ~ x1.4                             | 💧 | Hassaan et<br>al. 2015<br>[31]   |
| RT | Human<br>(Acute<br>porphyria<br>patient) | Hematin                                             | N/A                        | 4 mg/kg                        | intravenous          | <i>in vivo</i>  | ~20   | ~30 <sup>c</sup> | ~ x1.5                             | 💧 | Glueck et<br>al. 1983<br>[23]    |
| RT | Human<br>(Acute<br>porphyria<br>patient) | Hematin                                             | N/A                        | 0.1<br>mg/ml                   | - (plasma<br>sample) | <i>in vitro</i> | 25    | 50               | ~ x2.0                             | 💧 | Glueck et<br>al. 1983<br>[23]    |
| TT | Human                                    | Lithium<br>ferriheme                                | N/A                        | 100 mg.<br>%                   | - (plasma<br>sample) | <i>in vitro</i> | 3     | N/A              | No<br>significant<br>change        | - | Barnard<br>1947 [36]             |
| TT | Human                                    | Lithium<br>ferriheme                                | N/A                        | 20 mg.<br>%                    | - (plasma<br>sample) | <i>in vitro</i> | 3     | 10               | ~x3.3                              | 💧 | Barnard<br>1947 [36]             |
| TT | Human                                    | Lithium<br>ferriheme                                | N/A                        | 40 mg.<br>%                    | - (plasma<br>sample) | <i>in vitro</i> | 3     | 35               | ~x11.7                             | 💧 | Barnard<br>1947 [36]             |
| TT | Human                                    | Lithium<br>ferriheme                                | N/A                        | 60 mg.<br>%                    | - (plasma<br>sample) | <i>in vitro</i> | 3     | -                | Complete<br>clotting<br>prevention | 💧 | Barnard<br>1947 [36]             |

|    |                                    |                            |                                                                           |                         |                   |                 |                          |                          |                                    |     |                           |
|----|------------------------------------|----------------------------|---------------------------------------------------------------------------|-------------------------|-------------------|-----------------|--------------------------|--------------------------|------------------------------------|-----|---------------------------|
| TT | Human<br>(Acute porphyria patient) | Hematin                    | N/A                                                                       | 4 mg/kg, every 12 hours | intravenous       | Case report     | N/A                      | N/A                      | No significant change <sup>b</sup> | -   | Glueck et al. 1983 [23]   |
| TT | Human<br>(Acute porphyria patient) | Hematin                    | N/A                                                                       | 4 mg/kg                 | intravenous       | <i>in vivo</i>  | ~10                      | ~25 <sup>c</sup>         | ~ x2.5                             | ●   | Glueck et al. 1983 [23]   |
| TT | Human<br>(Acute porphyria patient) | Hematin                    | N/A                                                                       | 0.01-0.03 mg/ml         | - (plasma sample) | <i>in vitro</i> | ~15                      | ~20 - >60                | ~ x1.3 - >4.0                      | ●   | Glueck et al. 1983 [23]   |
| TT | Human                              | Hematin                    | 0.25% Na <sub>2</sub> CO <sub>3</sub> ; diluted in barbital buffer pH 7.4 | 0.01 mg/ml              | - (plasma sample) | <i>in vitro</i> | ~13                      | ~46                      | ~ x3.5                             | ●   | Green et al. 1983 [37]    |
| TT | Human                              | Hematin                    | 1 N NaOH, diluted in potassium phosphat buffer (pH 7.5)                   | 60 µg/ml                | - (plasma sample) | <i>in vitro</i> | 13.0 (0 h) - 12.0 (50 d) | 13.8 (0 h) - 27.8 (50 d) | ≤ x2.3 (aged hematin exclusively)  | -/● | Jones 1986 [25]           |
| TT | Human                              | Hematin                    | 1 N sodium carbonate (pH 7.5))                                            | 60 µg/ml                | - (plasma sample) | <i>in vitro</i> | 13.0 (0 h) - 12.0 (50 d) | 12.9 (0 h) - 25.9 (50 d) | ≤ x2.2 (aged hematin exclusively)  | -/● | Jones 1986 [25]           |
| TT | Rat                                | Hematin                    | 1 N sodium carbonate (pH 7.5))                                            | 12 mg/kg                | intravenous       | <i>in vivo</i>  | 14.0                     | N/A                      | ~ x1.6 (3 min after injection)     | ●   | Jones 1986 [25]           |
| TT | Human                              | Heme arginate (Normosang®) | Aqueous solution + 40% 1,2-                                               | 3 mg/kg                 | intravenous       | <i>in vivo</i>  | ~18.7                    | ~18.9 <sup>d,e</sup>     | No significant change              | -   | Tenhunen et al. 1987 [16] |

|    |                     |                            |                                                          |         |             |                |       |                                                                                                 |                       |   |                             |
|----|---------------------|----------------------------|----------------------------------------------------------|---------|-------------|----------------|-------|-------------------------------------------------------------------------------------------------|-----------------------|---|-----------------------------|
| TT | Human               | Heme arginate (Normosang®) | propanediol + 10% ethanol<br>Physiological saline        | 3 mg/kg | intravenous | <i>in vivo</i> | ~19.0 | 19.0 <sup>f</sup>                                                                               | No significant change | - | Volin et al. 1988 [26]      |
| TT | Human               | Hematin (Panhematin®)      | 0.05 M Na <sub>2</sub> CO <sub>3</sub> , 0.04 M sorbitol | 4 mg/kg | intravenous | <i>in vivo</i> | N/A   | N/A                                                                                             | ~ x1.1                | ● | Simionatto et al. 1988 [17] |
| TT | Human (AIP patient) | Hematin (Panhematin®)      | 0.05 M Na <sub>2</sub> CO <sub>3</sub> , 0.04 M sorbitol | 4 mg/kg | intravenous | Case report    | 17    | 19 (1 hour after 1 <sup>st</sup> injection), 17 (1 hour after 2 <sup>nd</sup> injection, day 4) | No change             | - | Green & Ts'ao 1990 [27]     |
| TT | Human (AIP patient) | Hematin (Panhematin®)      | 0.05 M Na <sub>2</sub> CO <sub>3</sub> , 0.04 M sorbitol | 4 mg/kg | intravenous | Case report    | 18.9  | 25.6                                                                                            | ~ x1.4                | ● | Gajra et al. 2000 [20]      |

<sup>1</sup> 11 h after first injection. <sup>2</sup> 7 h after 4<sup>th</sup> injection. <sup>3</sup> 10 min after injection. <sup>4</sup> 15 min after hematin infusion. <sup>5</sup> 4 h after infusion. <sup>f</sup> = 15 min to 24 h after administration. ● = Evidence for a tendency to an anticoagulant effect of heme and its formulations. ECLT = Euglobulin clot lysis time; PTT = partial thromboplastin time.

**Supplementary table S3.** Overview of the impact of heme intoxication on cells participating in blood coagulation.

| Cell type | Organism | Compound | Solvent                                                           | Dose     | Injection   | Setting        | Observation                                      | Effect | Reference      |
|-----------|----------|----------|-------------------------------------------------------------------|----------|-------------|----------------|--------------------------------------------------|--------|----------------|
| Platelet  | Rabbit   | Hematin  | 0.85% NaCl + 2% Na <sub>2</sub> CO <sub>3</sub> alkaline solution | 25 mg/kg | intravenous | <i>in vivo</i> | Platelet count ↓ (70% ↓, 1 hour after injection) | ●      | Brown 1913 [3] |

|          |                     |         |                                                                              |                                |                                 |                 |                                                                                                                                          |                                                                                       |                           |
|----------|---------------------|---------|------------------------------------------------------------------------------|--------------------------------|---------------------------------|-----------------|------------------------------------------------------------------------------------------------------------------------------------------|---------------------------------------------------------------------------------------|---------------------------|
| Platelet | Human (AIP patient) | Hematin | N/A                                                                          | 196 mg, every 12 hours         | intravenous                     | Case report     | Platelet count ↓ (~57% ↓, 12 hours after injection)                                                                                      |    | Morris et al. 1981 [11]   |
| Platelet | -                   | Heme    | 25% pyridine (pH 12.6), diluted with 30% pyridine (pH 12.2)                  | 0.15 - 770 mM                  | -                               | <i>in vitro</i> | Heme reduction by epinephrine essential for platelet activation                                                                          |    | Peterson et al. 1982 [38] |
| Platelet | -                   | Hemin   | N/A                                                                          | N/A                            | -                               | <i>in vitro</i> | Enhancement of ADP- and epinephrine-dependent platelet aggregation, hemin-binding to platelet membrane and granula membrane of platelets |    | Malik et al. 1983 [39]    |
| Platelet | Human (AIP patient) | Hematin | N/A                                                                          | 4 mg/kg, every 12 hours        | intravenous                     | Case report     | Platelet count ↓ (~12% ↓, 7 hours after 4 <sup>th</sup> injection), thrombocytopenia                                                     | -                                                                                     | Glueck et al. 1983 [23]   |
| Platelet | Human (AIP patient) | Hematin | N/A                                                                          | 4 mg/kg                        | intravenous                     | <i>in vivo</i>  | Platelet count ↓ (~41% ↓, 10 minutes after injection)                                                                                    | -                                                                                     | Glueck et al. 1983 [23]   |
| Platelet | Human               | Hematin | N/A                                                                          | 0.1 mg/ml (≅ 158 μM)           | - (platelet-rich plasma sample) | <i>in vitro</i> | Platelet aggregation ↑, Serotonin secretion ↑, ATP secretion ↑                                                                           |    | Glueck et al. 1983 [23]   |
| Platelet | Human               | Hematin | 0.25% Na <sub>2</sub> CO <sub>3</sub> (pH 7.4), diluted with isotonic saline | 2 - 5 μg/ml (≅ 3.2 - 7.9 μM)   | - (washed platelets)            | <i>in vitro</i> | Platelet aggregation ↑                                                                                                                   |  | Neely et al. 1984 [40]    |
| Platelet | Human               | Hematin | 0.25% Na <sub>2</sub> CO <sub>3</sub> (pH 7.4), diluted with isotonic saline | 5 - 10 μg/ml (≅ 7.9 - 15.8 μM) | - (washed platelets)            | <i>in vitro</i> | Thromboxane A <sub>2</sub> generation ↑ (~ 92.7 - 187.3 ng per billion platelets; dose-dependent)                                        |  | Neely et al. 1984 [40]    |

|          |                                           |                                            |                                                                              |                                               |                      |                 |                                                                                                                                                                   |                                                                                           |                                                |
|----------|-------------------------------------------|--------------------------------------------|------------------------------------------------------------------------------|-----------------------------------------------|----------------------|-----------------|-------------------------------------------------------------------------------------------------------------------------------------------------------------------|-------------------------------------------------------------------------------------------|------------------------------------------------|
| Platelet | Human                                     | Hematin                                    | 0.25% Na <sub>2</sub> CO <sub>3</sub> (pH 7.4), diluted with isotonic saline | 2 µg/ml (± 3.2 µM)                            | - (washed platelets) | <i>in vitro</i> | ATP release ↓ (slightly)                                                                                                                                          |        | Neely et al. 1984 [40]                         |
| Platelet | Human (myelodysplastic syndrome patients) | Heme arginate (Normosan g®)                | 0.9% saline solution                                                         | 2 - 3 mg/kg (applied as 25 mg/ml, repetitive) | intravenous          | Case reports    | Platelet count ↑ (~ 2.2 - >8-fold after several weeks)                                                                                                            | -                                                                                         | Ruutu et al. 1987 [15], Volin et al. 1988 [41] |
| Platelet | Human (AIP patients)                      | Heme arginate (Normosan g®)                | 0.9% NaCl                                                                    | 3 mg/kg                                       | intravenous          | Case reports    | Platelet count ↑ (~ 1.2-fold after several weeks)                                                                                                                 | -                                                                                         | Herrick et al. 1989 [18]                       |
| Platelet | Human (AIP patient)                       | Hematin (Panhematin®)                      | 0.05 M Na <sub>2</sub> CO <sub>3</sub> , 0.04 M sorbitol                     | 4 mg/kg                                       | intravenous          | Case report     | Platelet count ↑ (e.g., ~ 1.2-fold, 24 hours after treatment), platelet aggregation ↓, Platelet ATP content ↓, platelet ADP content ↓<br>Platelet count ↓ (44% ↓) | -                                                                                         | Green & Ts'ao 1990 [27]                        |
| Platelet | Human (AIP patient)                       | Hematin (Panhematin®)                      | 0.05 M Na <sub>2</sub> CO <sub>3</sub> , 0.04 M sorbitol                     | 4 mg/kg                                       | intravenous          | Case report     | Platelet count ↓ (44% ↓)                                                                                                                                          | -                                                                                         | Gajra et al. 2000 [20]                         |
| Platelet | Rat                                       | Albumin-heme (50 g/l & 3 mM, respectively) | 0.9% NaCl, pH 7.4                                                            | 10 - 44% (± 0.28 - 1.2 mM)                    | - (whole blood)      | <i>in vitro</i> | No change of total number                                                                                                                                         | -                                                                                         | Huang et al. 2003 [28]                         |
| Platelet | Mouse (wild-type & HO-1 KO)               | Hemin                                      | Phosphate-buffered saline                                                    | 15 - 40 mg/kg, twice daily                    | intraperitoneal      | <i>in vivo</i>  | Platelet cGMP level ↑, accelerated platelet-rich thrombi formation in HO-1 knockout mice after induction                                                          |  / - | Peng et al. 2004 [42]                          |

|          |       |                                            |                   |                                 |                 |                 |                                                                                                                                                                                                                                                                                                                                                                                                                                                                                    |                                                                                      |                              |
|----------|-------|--------------------------------------------|-------------------|---------------------------------|-----------------|-----------------|------------------------------------------------------------------------------------------------------------------------------------------------------------------------------------------------------------------------------------------------------------------------------------------------------------------------------------------------------------------------------------------------------------------------------------------------------------------------------------|--------------------------------------------------------------------------------------|------------------------------|
| Platelet | Rat   | Hemin                                      | < 0.5% DMSO       | 50 mg/kg                        | intraperitoneal | <i>in vivo</i>  | by FeCl <sub>3</sub> , no thrombosis promotion by heme without FeCl <sub>3</sub> pretreatment<br>Significant increase of platelet count (~1.4-fold)                                                                                                                                                                                                                                                                                                                                |   | Desbuards et al. 2007 [29]   |
| Platelet | Human | Albumin-heme (50 g/l & 3 mM, respectively) | 0.9% NaCl, pH 7.4 | 10 - 40% ( $\pm$ 0.28 - 1.1 mM) | - (whole blood) | <i>in vitro</i> | No change of ADP-stimulated platelet activation                                                                                                                                                                                                                                                                                                                                                                                                                                    | -                                                                                    | Komatsu et al. 2007 [43]     |
| Platelet | Mouse | Hemin                                      | N/A               | 1 mM                            | - (mouse aorta) | <i>ex vivo</i>  | Platelet aggregation as a consequence of endothelial denudation $\uparrow$                                                                                                                                                                                                                                                                                                                                                                                                         |   | Woollard et al. 2009 [44]    |
| Platelet | Human | Hemin                                      | N/A               | 0 - 25 $\mu$ M                  | - (platelets)   | <i>in vitro</i> | Ferroptosis $\uparrow$ , platelet activation $\uparrow$ , P-selectin translocation $\uparrow$ , reorganization of actin filaments $\uparrow$ , lipid peroxidation $\uparrow$ , cell viability $\uparrow$ , LDH release $\uparrow$ , HO-1 expression $\uparrow$ , cytosolic iron $\uparrow$ , GSH/GSSG ratio $\downarrow$ , $\gamma$ -glutamyltransferase level $\uparrow$                                                                                                          |   | NaveenKumar et al. 2018 [45] |
| Platelet | Human | Hemin                                      | N/A               | 0-25 $\mu$ M                    | - (platelets)   | <i>in vitro</i> | Activation of platelets $\uparrow$ , Cell viability $\downarrow$ , LDH release $\uparrow$ , P-selectin level $\uparrow$ , filopodia-like structure of platelets (10 $\mu$ M hemin), ROS generation $\uparrow$ , mitochondrial cardiolipin oxidation $\uparrow$ , mitochondrial membrane potential $\downarrow$ , anti-apoptotic Bcl-2 level $\downarrow$ , apoptotic Bcl-2 level $\uparrow$ , GSH/GSSG ratio $\downarrow$ , NLRP-3 activation $\uparrow$ , prevention by melatonin |  | NaveenKumar et al. 2019 [46] |

|                         |        |         |                                                                                                    |                                |               |                 |                                                                                                                                                                                                                                                                                                      |                                                                                       |                              |
|-------------------------|--------|---------|----------------------------------------------------------------------------------------------------|--------------------------------|---------------|-----------------|------------------------------------------------------------------------------------------------------------------------------------------------------------------------------------------------------------------------------------------------------------------------------------------------------|---------------------------------------------------------------------------------------|------------------------------|
| Platelet                | Mouse  | Hemin   | N/A                                                                                                | 50 µmol/kg                     | N/A           | <i>in vivo</i>  | Platelet number ↓, soluble P-selectin level ↑, prevention by melatonin                                                                                                                                                                                                                               |    | NaveenKumar et al. 2019 [46] |
| Platelet                | Human  | Hemin   | N/A                                                                                                | 0.75 - 50 µM                   | - (platelets) | <i>in vitro</i> | Rapid platelet aggregation (2 - 12 µM), slower/reduced platelet aggregation (25 µM), P-selectin expression ↑, GPIIb/IIIa activation ↑, phosphatidylserine exposure on platelets (≥ 25 µM), phosphorylation of Syk and PLCγ2 ↑, CLEC2-mediated platelet activation, independent from oxidative stress |    | Bourne et al. 2020 [47]      |
| Platelet                | Mouse  | Hemin   | N/A                                                                                                | 1.56 - 50 µM                   | - (platelets) | <i>in vitro</i> | Platelet aggregation ↑, CLEC2-mediated platelet activation                                                                                                                                                                                                                                           |    | Bourne et al. 2020 [47]      |
| <b>Endothelial cell</b> | Bovine | Hematin | 0.25% Na <sub>2</sub> CO <sub>3</sub> (pH 7.4), diluted with isotonic saline or 50 mM HEPES buffer | 2 - 40 µg/ml (≅ 3.2 - 63.1 µM) | - (BAECs)     | <i>in vitro</i> | Reversible morphologic changes of BAECs (bulging, exposed areas, surface vesiculation, cell retraction), no significant change in cell detachment                                                                                                                                                    |    | Neely et al. 1984 [48]       |
| Endothelial cell        | Bovine | Hematin | 0.25% Na <sub>2</sub> CO <sub>3</sub> (pH 7.4), diluted with isotonic saline or 50 mM HEPES buffer | 100 µg/ml (≅ 158 µM)           | - (BAECs)     | <i>in vitro</i> | Cell detachment ↑ (from ~7.9 to ~13.0%)                                                                                                                                                                                                                                                              |  | Neely et al. 1984 [48]       |

|                  |               |                        |                                                                                                    |                      |                 |                 |                                                                                                                                                                                                                                  |                                                                                       |                           |
|------------------|---------------|------------------------|----------------------------------------------------------------------------------------------------|----------------------|-----------------|-----------------|----------------------------------------------------------------------------------------------------------------------------------------------------------------------------------------------------------------------------------|---------------------------------------------------------------------------------------|---------------------------|
| Endothelial cell | Bovine        | Hematin                | 0.25% Na <sub>2</sub> CO <sub>3</sub> (pH 7.4), diluted with isotonic saline or 50 mM HEPES buffer | 40 µg/ml (≅ 63.1 µM) | - (BAECs)       | <i>in vitro</i> | Platelet adhesion to BAECs ↑ (2-fold)                                                                                                                                                                                            |    | Neely et al. 1984 [48]    |
| Endothelial cell | Pig           | Hemin                  | 20 mM NaOH, diluted with buffer                                                                    | N/A                  | - (PAECs)       | <i>in vivo</i>  | Rapid uptake of heme, sensitivity towards oxidants ↑                                                                                                                                                                             | -                                                                                     | Balla et al. 1991 [49]    |
| Endothelial cell | Pig           | Hemin                  | 20 mM NaOH, diluted with buffer                                                                    | 1 - 10 µM            | - (PAECs)       | <i>in vivo</i>  | LDL oxidation ↑; extremely cytotoxic                                                                                                                                                                                             | -                                                                                     | Balla et al. 1991 [50]    |
| Endothelial cell | Mouse         | Hemin                  | N/A                                                                                                | 1 mM                 | - (mouse aorta) | <i>ex vivo</i>  | Denudation of endothelium ↑, collagen exposure ↑, platelet aggregation ↑                                                                                                                                                         |    | Woollard et al. 2009 [44] |
| Endothelial cell | Bovine        | Hemin                  | DMSO                                                                                               | 10 - 50 µM           | - (BAECs)       | <i>in vitro</i> | LDH release ↑, apoptosis ↑, ATP ↓ (only when 50 µM hemin was applied), mitochondrial dysfunction ↑, lipid peroxidation ↑, protein carbonyl formation ↑, protein thiol oxidation ↑, autophagy activation ↑, mitophagy induction ↑ |                                                                                       | Higdon et al. 2012 [51]   |
| Endothelial cell | Mouse (NY1DD) | Hemin (as Panhematin®) | D-sorbitol, Na <sub>2</sub> CO <sub>3</sub> , saline (as Panhematin®)                              | 0.4 - 32 µmol/kg     | intravenous     | <i>in vivo</i>  | Endothelial cell activation through TLR4 signaling ↑, vaso-occlusion ↑, expression of adhesion molecules ↑                                                                                                                       |  | Belcher et al. 2014 [52]  |



|                  |             |                        |                                                                       |                                                    |             |                 |                                                                                                                                                                                                                                                                                                        |                                                                                       |                          |
|------------------|-------------|------------------------|-----------------------------------------------------------------------|----------------------------------------------------|-------------|-----------------|--------------------------------------------------------------------------------------------------------------------------------------------------------------------------------------------------------------------------------------------------------------------------------------------------------|---------------------------------------------------------------------------------------|--------------------------|
| Endothelial cell | Human       | Hemin (as Panhematin®) | D-sorbitol, Na <sub>2</sub> CO <sub>3</sub> , saline (as Panhematin®) | 20 µM                                              | - (HUVECs)  | <i>in vitro</i> | Endothelial cell activation through TLR4 signaling ↑, vaso-occlusion ↑, expression of adhesion molecules ↑                                                                                                                                                                                             |    | Belcher et al. 2014 [52] |
| Endothelial cell | Human       | Heme-laden MPs (SCD)   | N/A                                                                   | ~20 nM (50 control MPs/µl), ~65 nM (50 SCD MPs/µl) | - (HUVECs)  | <i>in vitro</i> | Transfer of heme to HUVECs by MPs (SCD MPs & synthetic heme-laden MLVs: transfer ↑ (~4-fold), Blockage of transfer via annexin-a5 (PS-antagonist, 10 µg/ml) or hemopexin (2 µM), ROS production ↑ (inhibited by annexin-a5, reduced by hemopexin (50%), prevented by TLR4 neutralization), apoptosis ↑ |    | Camus et al. 2015 [53]   |
| Endothelial cell | Mouse (SAD) | Heme-laden MPs (SCD)   | N/A                                                                   | 300 MPs/µl                                         | intravenous | <i>ex vivo</i>  | ACH-dependent vasodilation of endothelium ↓, blood flow velocity in renal arteries ↓ (30% ↓)                                                                                                                                                                                                           |    | Camus et al. 2015 [53]   |
| Endothelial cell | Mouse (SAD) | Heme                   | N/A                                                                   | 100 nM                                             | intravenous | <i>ex vivo</i>  | ACH-dependent vasodilation of endothelium ↓                                                                                                                                                                                                                                                            |    | Camus et al. 2015 [53]   |
| Endothelial cell | Human       | Hemin                  | 0,25 M NaOH, diluted in PBS (pH 7.4)                                  | 5 - 100 µM                                         | - (HLMVECs) | <i>in vitro</i> | Transendothelial electrical resistance ↓, permeability of monolayer ↑, programmed cell death ↑, effects abrogable by: TLR4-inhibitor, antioxidant N-acetylcystein, iron chelator deferoxamine), MLKL activation (necroptosis) ↑                                                                        | -                                                                                     | Singla et al. 2017 [54]  |
| Endothelial cell | Human       | Hemin                  | 50 mM NaOH, 145 mM NaCl, diluted with medium                          | 12.5 - 50 µM                                       | - (HUVECs)  | <i>in vitro</i> | C3 deposition ↑, TM expression ↑, HO-1 gene expression ↑, HO-1 protein expression ↑                                                                                                                                                                                                                    |  | May et al. 2018 [55]     |

|                  |                 |         |                                                 |                   |                 |                 |                                                                                                                                                                                                                                                                  |                                                                                       |                          |
|------------------|-----------------|---------|-------------------------------------------------|-------------------|-----------------|-----------------|------------------------------------------------------------------------------------------------------------------------------------------------------------------------------------------------------------------------------------------------------------------|---------------------------------------------------------------------------------------|--------------------------|
| Endothelial cell | Human           | Hemin   | 50 mM NaOH, 145 mM NaCl, diluted with medium    | 12.5 - 50 $\mu$ M | - (HMECs)       | <i>in vitro</i> | C3 deposition $\uparrow$ , TM expression $\uparrow$ , HO-1 gene expression $\uparrow$ , HO-1 protein expression $\uparrow$                                                                                                                                       |    | May et al. 2018 [55]     |
| Endothelial cell | Human           | Hemin   | 50 mM NaOH, 145 mM NaCl, diluted with medium    | 12.5 - 50 $\mu$ M | - (GENCs)       | <i>in vitro</i> | C3 deposition $\uparrow$ , TM expression $\uparrow$ , HO-1 gene expression $\uparrow$ , HO-1 protein expression $\uparrow$ (slightly)                                                                                                                            |    | May et al. 2018 [55]     |
| Endothelial cell | Human           | Hemin   | 50 mM NaOH, 145 mM NaCl, diluted with medium    | 12.5 - 50 $\mu$ M | - (HRGECs)      | <i>in vitro</i> | C3 deposition $\uparrow$ (higher extent than in vascular ECs), TM expression $\uparrow$ , HO-1 gene expression $\uparrow$ , HO-1 protein expression $\uparrow$ (slightly)                                                                                        |    | May et al. 2018 [55]     |
| Endothelial cell | Mouse (C57B1/6) | Hemin   | 50 mM NaOH, 145 mM NaCl, diluted with PBS       | 40 $\mu$ mol/kg   | intraperitoneal | <i>in vivo</i>  | C3 deposition in kidney glomeruli $\uparrow$ , skin and large liver vessel TM levels $\uparrow$ , lung microvasculature TM levels $\downarrow$ , HO-1 levels in proximal tubules (liver, heart, skin, lungs) $\uparrow$ , HO-1 colocalization with blood vessels |    | May et al. 2018 [55]     |
| Endothelial cell | Human           | Hemin   | 50 mM NaOH, 145 mM NaCl, diluted with vehicle   | 50 $\mu$ M        | - (HUVECs)      | <i>in vitro</i> | P-selectin expression $\uparrow$ , complement activation $\uparrow$ , protection by hemopexin                                                                                                                                                                    |   | Merle et al. 2018 [56]   |
| Endothelial cell | Human           | Hemin   | 0.1 M NaOH, diluted in FBS                      | 20 - 40 $\mu$ M   | - (ECs)         | <i>in vitro</i> | P-selectin expression $\uparrow$ , VCAM-1 expression $\uparrow$ , HbS RBC adhesion to heme-activated ECs $\uparrow$                                                                                                                                              |  | Kucukal et al. 2018 [57] |
| <b>RBC</b>       | Rabbit          | Hematin | 0.85% NaCl + 2% Na <sub>2</sub> CO <sub>3</sub> | < 15 mg/kg        | Intravenous     | <i>in vivo</i>  | Rarely: RBC count $\downarrow$ (fast regeneration)                                                                                                                                                                                                               | -                                                                                     | Brown 1913 [3]           |

|     |                     |                              |                                                                         |                               |                 |                 |                                                                                                                 |   |                          |
|-----|---------------------|------------------------------|-------------------------------------------------------------------------|-------------------------------|-----------------|-----------------|-----------------------------------------------------------------------------------------------------------------|---|--------------------------|
| RBC | Rabbit              | Hematin                      | alkaline solution<br>0.85% NaCl +<br>2% Na <sub>2</sub> CO <sub>3</sub> | 20 mg/kg                      | Intravenous     | <i>in vivo</i>  | RBC count ↓ (decrease of ≥ 1000000 cells)                                                                       | 🔴 | Brown 1913 [3]           |
| RBC | Rabbit              | Hematin                      | alkaline solution<br>0.85% NaCl +<br>2% Na <sub>2</sub> CO <sub>3</sub> | 10 mg/kg<br>(daily)           | intravenous     | <i>in vivo</i>  | Irregular size, variable color, presence of immature cells (in particular basophilic cells), RBC count ↓ (~60%) | 🔴 | Brown 1913 [3]           |
| RBC | Human (AIP patient) | Hematin                      | N/A                                                                     | 196 mg,<br>every 12<br>hours  | intravenous     | Case report     | Hematocrit ↓ (from 32% to 22%, 12 hours after injection)                                                        | 🔴 | Morris et al. 1981 [11]  |
| RBC | Mouse               | Heme                         | 5 mM NaOH,<br>diluted with<br>medium                                    | 0 - 7 μM                      | - (RBCs)        | <i>in vitro</i> | Hemolysis ↑, glutathione level ↓, ATP level ↓, hemoglobin amount ↓                                              | - | Chou et al. 1981 [58]    |
| RBC | Human (AIP patient) | Hematin                      | N/A                                                                     | 4 mg/kg,<br>every 12<br>hours | intravenous     | Case report     | Hematocrit ↓ (from 36% to 32%, 7 hours after 4 <sup>th</sup> injection), no morphological changes               | 🔴 | Glueck et al. 1983 [23]  |
| RBC | Human               | Hemin                        | 0.01 M NaOH,<br>diluted with<br>water                                   | 0 - 500 μM                    | - (RBCs)        | <i>in vitro</i> | Conformational change of spectrin and protein 4.1, RBC membrane stability ↓                                     | - | Liu et al. 1985 [59]     |
| RBC | Human               | Hemin                        | 20 mM NaOH,<br>diluted with<br>water                                    | 0.2 - 40 μM                   | - (RBCs)        | <i>in vitro</i> | Hemolysis ↑, heme accumulation in RBC membrane, heme extractable from membranes by albumin                      |   | Shaklai et al. 1985 [60] |
| RBC | Rat                 | Albumin-heme (50 g/l & 3 mM, | 0.9% NaCl,<br>pH 7.4                                                    | 10 - 44%<br>(0.28 - 1.2 mM)   | - (whole blood) | <i>in vitro</i> | No change                                                                                                       | - | Huang et al. 2003 [28]   |

|                  |                                           |                             |                                                                   |                                               |                                            |                 |                                                                                                                                                                             |                                                                                       |                                                |
|------------------|-------------------------------------------|-----------------------------|-------------------------------------------------------------------|-----------------------------------------------|--------------------------------------------|-----------------|-----------------------------------------------------------------------------------------------------------------------------------------------------------------------------|---------------------------------------------------------------------------------------|------------------------------------------------|
| RBC              | Rat                                       | respectively)<br>Hemin      | < 0.5% DMSO                                                       | 50 mg/kg                                      | intraperitoneal                            | <i>in vivo</i>  | No significant change of hematocrit, no change of RBC count                                                                                                                 | -                                                                                     | Desbouds et al. 2007 [29]                      |
| <b>Leukocyte</b> | Guinea pig                                | Hematin, hemin              | 0.85% salt solution                                               | 30 - 54 mg/kg                                 | intraperitoneal, subcutaneous, intravenous | <i>in vivo</i>  | Polymorphonuclear leucocyte ↑                                                                                                                                               | -                                                                                     | Brown 1911 [1]                                 |
| Leukocyte        | Rabbit                                    | Hematin                     | 0.85% NaCl + 2% Na <sub>2</sub> CO <sub>3</sub> alkaline solution | 10 mg/kg                                      | intravenous                                | <i>in vivo</i>  | Leukocytosis; total leukocyte number ↑ (~1.4-fold), large (~5.6-fold) and small (~1.5-fold) mononuclear cells ↑, basophiles ↑ (~2.7-fold), eosinophils ↓ (decrease of ~60%) | -                                                                                     | Brown 1913 [3]                                 |
| Leukocyte        | Rabbit                                    | Hematin                     | 0.85% NaCl + 2% Na <sub>2</sub> CO <sub>3</sub> alkaline solution | 20 mg/kg (daily)                              | intravenous                                | <i>in vivo</i>  | marked leukocytosis; total leukocyte number ↑ (x ~4.6), large mononuclear cells ↑ (~10-fold), polymorphonuclear cells ↑ (~7.8-fold)                                         | -                                                                                     | Brown 1913 [3]                                 |
| Leukocyte        | Human (myelodysplastic syndrome patients) | Heme arginate (Normosan g®) | 0.9% saline solution                                              | 2 - 3 mg/kg (applied as 25 mg/ml, repetitive) | intravenous                                | Case reports    | Neutrophil count ↑ (~2.1 - >5-fold)                                                                                                                                         | -                                                                                     | Ruutu et al. 1987 [15], Volin et al. 1988 [41] |
| Leukocyte        | Human                                     | Hematin                     | N/A                                                               | N/A                                           | -(PBMC)                                    | <i>in vitro</i> | Procoagulant activity of PBMCs ↑                                                                                                                                            |  | Smith & Winslow 1992 [61]                      |
| Leukocyte        | Mouse                                     | Hemin                       | 0.1 N NaOH, 10 mM Tris base (pH 8.6)                              | 750 μM (intravascular conc.)                  | intravenous                                | <i>in vivo</i>  | Leukocyte accumulation ↑ (spleen, liver, kidney, intestines, femur, brain, pancreas)                                                                                        | -                                                                                     | Wagener et al. 2001 [62]                       |

|           |       |                                            |                                                         |                                 |                 |                 |                                                                                                                                                                                                                                                                 |   |                              |
|-----------|-------|--------------------------------------------|---------------------------------------------------------|---------------------------------|-----------------|-----------------|-----------------------------------------------------------------------------------------------------------------------------------------------------------------------------------------------------------------------------------------------------------------|---|------------------------------|
| Leukocyte | Human | Hemin                                      | DMSO, diluted with PBS                                  | 0.1 - 20 $\mu$ M                | - (PMNs)        | <i>in vitro</i> | Neutrophil recruitment $\uparrow$ (PKC activation required), actin polymerization $\uparrow$ , oxidative burst in neutrophils $\uparrow$ , PKC activation $\uparrow$ , IL-8 expression $\uparrow$                                                               | - | Graça-Souza et al. 2002 [63] |
| Leukocyte | Rat   | Hemin                                      | DMSO, diluted with PBS                                  | 30 – 300 nmol/cavity            | intrathoracic   | <i>in vivo</i>  | Neutrophil migration $\uparrow$ , pleural neutrophil population $\uparrow$ , no changes of mononuclear cells                                                                                                                                                    | - | Graça-Souza et al. 2002 [63] |
| Leukocyte | Rat   | Albumin-heme (50 g/l & 3 mM, respectively) | 0.9% NaCl, pH 7.4                                       | 10 - 44% ( $\pm$ 0.28 - 1.2 mM) | - (whole blood) | <i>in vitro</i> | No change                                                                                                                                                                                                                                                       | - | Huang et al. 2003 [28]       |
| Leukocyte | Rat   | Hemin                                      | with Trizma base in 0.1 M NaOH, diluted in saline, pH 8 | 750 $\mu$ M                     | intradermally   | <i>in vivo</i>  | Leukocyte recruitment $\uparrow$                                                                                                                                                                                                                                | - | Wagener et al. 2003 [64]     |
| Leukocyte | Human | Hemin                                      | DMSO, diluted with PBS                                  | 1 - 50 $\mu$ M                  | - (neutrophils) | <i>in vitro</i> | Delay in neutrophil apoptosis, de novo synthesis of antiapoptotic proteins (e.g., Bcl-x <sub>L</sub> ), ERK-2 translocation $\uparrow$ , Akt phosphorylation $\uparrow$ , degradation of proapoptotic proteins (e.g. Bad), NF- $\kappa$ B activation $\uparrow$ | - | Arruda et al. 2004 [65]      |
| Leukocyte | Rat   | Hemin                                      | < 0.5% DMSO                                             | 50 mg/kg                        | intraperitoneal | <i>in vivo</i>  | Higher total leucocyte count ( $\times$ ~1.9), no changes of lymphocyte cell number                                                                                                                                                                             | - | Desbuard et al. 2007 [29]    |

|           |               |                        |                                                                       |               |                   |                 |                                                            |                                                                                     |                          |
|-----------|---------------|------------------------|-----------------------------------------------------------------------|---------------|-------------------|-----------------|------------------------------------------------------------|-------------------------------------------------------------------------------------|--------------------------|
| Leukocyte | Mouse (NY1DD) | Hemin (as Panhematin®) | D-sorbitol, Na <sub>2</sub> CO <sub>3</sub> , saline (as Panhematin®) | 3.2 μmol/kg   | intravenous       | <i>in vivo</i>  | Leukocyte rolling ↑, leukocyte adhesion ↑ (TLR4-dependent) | -                                                                                   | Belcher et al. 2014 [52] |
| Leukocyte | Mouse (SA)    | Hemin                  | DMSO, diluted in Hanks balanced salt solution                         | 50 μmol/kg    | intraperitoneal   | <i>in vivo</i>  | NET formation ↑                                            |  | Chen et al. 2014 [66]    |
| Leukocyte | Human         | Hemin                  | DMSO, diluted in Hank's balanced salt solution                        | 10 - 20 μM    | -(BM neutrophils) | <i>in vitro</i> | NET formation ↑                                            |  | Chen et al. 2014 [66]    |
| Leukocyte | Human         | Hemin                  | N/A                                                                   | 1.5 - 38.3 μM | -(neutrophils)    | <i>in vitro</i> | NET formation ↑                                            |  | Ohbuchi et al. 2017 [67] |

◆ = Evidence for a tendency to an anticoagulant effect of heme and its formulations.  = Evidence for a tendency to a procoagulant effect of heme and its formulations. ACH = acetylcholine; BAECs = Bovine aortic endothelial cells; BM = Bone marrow; FBS = fetal bovine serum; GENCs = Glomerular endothelial cells; HLMVECs = human lung microvascular endothelial cells; HMECs = Human Mammary Epithelial Cells; HO-1 = heme oxygenase 1; HRGECs = Human renal glomerular endothelial cells; HUVECs = human umbilical vein endothelial cells; MLKL = mixed lineage kinase domain-like; MLVs = synthetic multilayer vesicles; MPs = erythrocyte membrane microparticles; N/A = not applicable; n.d. = not determined; PMNs = Polymorphonuclear neutrophils, SA = hemizygous mice: Tg[*Hu-miniLCRα1GγAγδβS*] *Hba*<sup>-/-</sup>*Hbb*<sup>+/-</sup>; SAD = transgenic S-Antilles-D Punjab Hb-expressing mouse model of SCD; TM = thrombomodulin.

**Supplementary table S4.** Overview of the impact of heme and its formulations on proteins acting in blood coagulation.

| Protein             | Organism    | Compound | Solvent                      | Dose            | Injection       | Setting         | Observation                                         | Effect                                                                                | Reference             |
|---------------------|-------------|----------|------------------------------|-----------------|-----------------|-----------------|-----------------------------------------------------|---------------------------------------------------------------------------------------|-----------------------|
| Activated protein C | Mouse (CLP) | Hemin    | DMSO, diluted in PBS         | 50 μmol/kg      | intraperitoneal | <i>in vivo</i>  | APC plasma level ↑ (4 - 24 h after treatment)       |  | Fei et al. 2012 [30]  |
| Activated protein C | Human       | Hemin    | 30 mM NaOH, diluted in Tris- | 187.5 - 3000 nM | -               | <i>in vitro</i> | K <sub>D</sub> of 400 ± 47 nM, stoichiometry: 1:1.3 | -                                                                                     | Hopp et al. 2020 [32] |

|                                         |                     |                                         |                                                                     |                 |                 |                 |                                                                                                                                                   |                                                                                       |                            |
|-----------------------------------------|---------------------|-----------------------------------------|---------------------------------------------------------------------|-----------------|-----------------|-----------------|---------------------------------------------------------------------------------------------------------------------------------------------------|---------------------------------------------------------------------------------------|----------------------------|
| Activated protein C                     | Human               | Hemin                                   | HCl buffer (pH 7.4)<br>30 mM NaOH, diluted in HEPES buffer (pH 7.0) | 0 - 50 $\mu$ M  | -               | <i>in vitro</i> | (APC:heme), two binding sites identified<br>Amidolytic activity of rAPC (50 nM) and pdAPC (100 nM) ↓,<br>$K_i$ (pdAPC) = 12.56 $\pm$ 2.31 $\mu$ M | -                                                                                     | Hopp et al. 2020 [32]      |
| Activated protein C                     | Human               | Hemin                                   | 30 mM NaOH, diluted in DPBS buffer (pH 7.4)                         | 0 - 100 $\mu$ M | -               | <i>in vitro</i> | Anticoagulant activity of APC (5 nM) ↓                                                                                                            |    | Hopp et al. 2020 [32]      |
| Activated protein C                     | Human               | Hemin                                   | 30 mM NaOH, diluted in medium                                       | 120 $\mu$ M     | - (HUVECs)      | <i>in vitro</i> | APC (20 nM) protects from heme's cytotoxicity                                                                                                     |    | Hopp et al. 2020 [32]      |
| <b><math>\alpha</math>2-antiplasmin</b> | Human               | Heme                                    | -                                                                   | -               | -               | -               | Suggestion of a permanently bound heme                                                                                                            | -                                                                                     | Arkebauer et al. 2011 [68] |
| <b>Antithrombin-III</b>                 | Human (AIP patient) | Hematin                                 | N/A                                                                 | 4 mg/kg         | intravenous     | <i>in vivo</i>  | No change of plasma level                                                                                                                         | -                                                                                     | Glueck et al. 1983 [23]    |
| Antithrombin-III                        | Human               | Heme arginate (Normosang <sup>®</sup> ) | physiological saline                                                | 3 mg/kg         | intravenous     | <i>in vivo</i>  | Plasma levels not altered                                                                                                                         | -                                                                                     | Volin et al. 1988 [26]     |
| <b>Collagen</b>                         | Mouse               | Hemin                                   | N/A                                                                 | 1 mM            | - (mouse aorta) | <i>ex vivo</i>  | Endothelial collagen expression ↑                                                                                                                 |  | Woollard et al. 2009 [44]  |
| <b>E-selectin</b>                       | Human               | Hemin                                   | N/A                                                                 | 100 $\mu$ M     | - (HUVECs)      | <i>in vitro</i> | Surface expression of E-selectin (4-fold) ↑                                                                                                       |  | Wagener et al. 1997 [69]   |
| <b>Factor V</b>                         | Human (AIP patient) | Hematin                                 | N/A                                                                 | 4 mg/kg         | intravenous     | <i>in vivo</i>  | Plasma level ↓/FV activity ↓ (~80%) <sup>a</sup>                                                                                                  |  | Glueck et al. 1983 [23]    |
| <b>Factor VIII</b>                      | Human (AIP patient) | Hematin                                 | N/A                                                                 | 4 mg/kg         | intravenous     | <i>in vivo</i>  | Plasma level ↓ (~36.8%) <sup>a</sup>                                                                                                              |  | Glueck et al. 1983 [23]    |

|             |                        |                                                      |                                                                                    |                 |             |                 |                                                                                                                                                                                                |                                                                                     |                           |
|-------------|------------------------|------------------------------------------------------|------------------------------------------------------------------------------------|-----------------|-------------|-----------------|------------------------------------------------------------------------------------------------------------------------------------------------------------------------------------------------|-------------------------------------------------------------------------------------|---------------------------|
| Factor VIII | Human<br>(AIP patient) | Hematin                                              | N/A                                                                                | 4 mg/kg         | intravenous | <i>in vivo</i>  | Plasma level ↓ (~36.8%) <sup>a</sup>                                                                                                                                                           |  | Glueck et al. 1983 [23]   |
| Factor VIII | Human                  | Hematin                                              | 0.25% Na <sub>2</sub> CO <sub>3</sub> (24h), diluted with barbital buffer (pH 7.4) | 18 - 70 µg/ml   | - (plasma)  | <i>in vitro</i> | FVIII procoagulant activity ↓ (72% in pooled plasma, 88% in FVIII concentrate)                                                                                                                 |  | Green et al. 1983 [37]    |
| Factor VIII | Human                  | <sup>59</sup> Fe- and <sup>3</sup> H-labeled Hematin | 0.25% Na <sub>2</sub> CO <sub>3</sub>                                              | e.g. 0.17 mg/ml | -           | <i>in vitro</i> | Formation of FVIII/VWF complex, inhibition of FVIII-VWF dissociation, binding of FVIII/VWF-hematin complex to platelets                                                                        |  | Green et al. 1986 [70]    |
| Factor VIII | Human                  | Hemin                                                | DMSO, diluted in buffer                                                            | 0.01 - 6.4 µM   | -           | <i>in vitro</i> | Specific heme binding to rFVIII (Soret band shift to ~412 nm), ~10 binding sites, K <sub>D</sub> (full-length rFVIII) = 12.7 ± 6.1 nM, K <sub>D</sub> (B-domain-deleted rFVIII) = 1.9 ± 0.5 nM | -                                                                                   | Repressé et al. 2012 [71] |
| Factor VIII | Human                  | Hemin                                                | DMSO, diluted in buffer                                                            | Molar excess    | -           | <i>in vitro</i> | FVIII procoagulant activity ↓ (full-length rFVIII: by up to ~50%; B-domain-deleted rFVIII: by up to ~51%), prevention by VWF                                                                   |  | Repressé et al. 2012 [71] |
| Factor VIII | Human                  | Hemin                                                | DMSO, diluted in buffer                                                            | Molar excess    | -           | <i>in vitro</i> | FVIII-VWF interaction not altered, FVIII-phosphatidyl serine interaction not altered, FVIII-activated platelet interaction not altered, thrombin can cleave heme-bound FVIII                   | -                                                                                   | Repressé et al. 2012 [71] |



|                     |                     |                                         |                                                                                    |                |                           |                 |                                                                                             |                                                                                       |                               |
|---------------------|---------------------|-----------------------------------------|------------------------------------------------------------------------------------|----------------|---------------------------|-----------------|---------------------------------------------------------------------------------------------|---------------------------------------------------------------------------------------|-------------------------------|
| Factor VIII         | Human               | Hemin                                   | DMSO, diluted in buffer                                                            | Molar excess   | -                         | <i>in vitro</i> | Impaired FVIII-FIX interaction (by ~52%)                                                    |    | Repressé et al. 2012 [71]     |
| <b>Factor XII</b>   | Human               | Hematin                                 | 0.1 N NaOH, diluted in PBS                                                         | 3 - 24 nmol    | -(plasma)                 | <i>in vitro</i> | Increased activation (amidolytic and autoactivation) suggested                              |    | Becker et al. 1985 [24]       |
| Factor XII          | Mouse               | Hemin                                   | 0.1 M NaOH and 0.1 M Tris-HCl (pH 8.0)                                             | 0 - 35 µmol/kg | Retro-orbital             | <i>in vivo</i>  | Blocking of intrinsic pathway via FXII did not influence heme-driven coagulation activation | -                                                                                     | Sparkenbaugh et al. 2015 [72] |
| <b>Factor XIIIa</b> | Human               | Hemin                                   | 30 mM NaOH, diluted in Tris buffer (pH 7.5)                                        | 0 - 50 µM      | -                         | <i>in vitro</i> | No impact on the amidolytic activity of rFXIIIa (400 nM)                                    | -                                                                                     | Hopp et al. 2020 [32]         |
| <b>FDP</b>          | Human (AIP patient) | Hematin                                 | N/A                                                                                | 4 mg/kg        | intravenous               | <i>in vivo</i>  | Plasma level ↑ (~ x2) <sup>a</sup>                                                          |    | Glueck et al. 1983 [23]       |
| FDP                 | Human               | Heme arginate (Normosang <sup>®</sup> ) | physiological saline                                                               | 3 mg/kg        | intravenous               | <i>in vivo</i>  | Plasma levels not altered                                                                   | -                                                                                     | Volin et al. 1988 [26]        |
| <b>Fibrinogen</b>   | Human (AIP patient) | Hematin                                 | N/A                                                                                | 4 mg/kg        | intravenous               | <i>in vivo</i>  | Plasma level ↓ (~32.1 %) <sup>a</sup>                                                       |    | Glueck et al. 1983 [23]       |
| Fibrinogen          | Bovine              | Hematin                                 | 0.25% Na <sub>2</sub> CO <sub>3</sub> (24h), diluted with barbital buffer (pH 7.4) | 50 µg/ml       | -                         | <i>in vitro</i> | Hematin binding to fibrinogen (2 mg/ml), thrombin clottability of fibrinogen ↓              |  | Green et al. 1983 [37]        |
| Fibrinogen          | Human               | Hematin                                 | 0.25% Na <sub>2</sub> CO <sub>3</sub> (pH 7.4), diluted with isotonic saline       | 7 µg/ml        | -(gel-filtered platelets) | <i>in vitro</i> | Hematin-induced fibrinogen binding to platelets ↑ (~13.8%; 30 min preincubation)            |  | Neely et al. 1984 [40]        |
| Fibrinogen          | Human               | Heme arginate                           | physiological saline                                                               | 3 mg/kg        | intravenous               | <i>in vivo</i>  | Plasma levels not altered                                                                   | -                                                                                     | Volin et al. 1988 [26]        |

|               |       |                                   |                                   |            |                  |                 |                                                                                                                                                                                                                                           |                                                                                       |                          |
|---------------|-------|-----------------------------------|-----------------------------------|------------|------------------|-----------------|-------------------------------------------------------------------------------------------------------------------------------------------------------------------------------------------------------------------------------------------|---------------------------------------------------------------------------------------|--------------------------|
| Fibrinogen    | Human | (Normosang <sup>®</sup> )<br>Heme | -                                 | -          | -                | <i>in vitro</i> | Suggestion of at least one permanently bound heme                                                                                                                                                                                         | -                                                                                     | Nielsen et al. 2011 [73] |
| Fibrinogen    | Human | Hemin                             | 0.1 M NaOH, diluted with T buffer | 10 μM      | -                | <i>in vitro</i> | Binding of hemin to immobilized fibrinogen                                                                                                                                                                                                | -                                                                                     | Orino 2013 [74]          |
| Fibrinogen    | Pig   | Hematin                           | 0.05 M NaOH                       | 0 - 500 μM | -(blood, plasma) | <i>in vitro</i> | Cross-linking (≥ 1 min exposure) ↑, formation of high molecular weight polymers (> 245 kDa) ↑, H <sub>2</sub> O <sub>2</sub> -dependent                                                                                                   |    | Ke & Huang 2016 [75]     |
| Fibrinogen    | Human | Hematin                           | 0.05 M NaOH                       | 30 μM      | -                | <i>in vitro</i> | Cross-linking of fibrinogen (10 mg/ml; 2 min exposure) ↑, membrane-like layer formation ↑, formation of high molecular weight polymers (> 245 kDa) ↑, dityrosine formation ↑                                                              |    | Ke & Huang 2016 [75]     |
| Fibrinogen    | Human | Hematin                           | 0.05 M NaOH                       | 20 μM      | -                | <i>in vitro</i> | Binding to fibrinogen (Soret band shift to 410 nm; hexacoordination)                                                                                                                                                                      | -                                                                                     | Ke & Huang 2016 [75]     |
| Fibrinogen    | Human | Hemin                             | DMSO                              | 25 - 50 μM | -                | <i>in vitro</i> | Binding to fibrinogen (Soret band red-shift, change of conformation), cross-linking of fibrinogen, one binding site predicted, K <sub>b</sub> = 3.0 ± 0.4 × 10 <sup>5</sup> M <sup>-1</sup> , increased peroxidase-like activity of hemin |  | Hou et al. 2018 [76]     |
| <b>Fibrin</b> | Human | Hematoporphyrin                   | N/A                               | N/A        | -                | <i>in vitro</i> | No binding to fibrin                                                                                                                                                                                                                      | -                                                                                     | Musser et al. 1980 [77]  |

|                    |                     |         |                                                                                    |                    |                      |                 |                                                                                                      |                                                                                       |                            |
|--------------------|---------------------|---------|------------------------------------------------------------------------------------|--------------------|----------------------|-----------------|------------------------------------------------------------------------------------------------------|---------------------------------------------------------------------------------------|----------------------------|
| <b>ICAM-1</b>      | Human               | Hemin   | N/A                                                                                | 50 - 100<br>μM     | - (HUVECs)           | <i>in vitro</i> | Surface expression of ICAM-1 (2 to 4.4-fold) ↑                                                       |    | Wagener et al. 1997 [69]   |
| ICAM-1             | Mouse               | Hemin   | 0.1 N NaOH, 10 mM Tris base (pH 8.6)                                               | 750 μM             | intravenous          | <i>in vivo</i>  | Endothelial surface expression of ICAM-1 ↑ (1 - 24 hours after administration)                       |    | Wagener et al. 2001 [62]   |
| <b>Kallikrein</b>  | Human               | Hematin | 0.1 N NaOH, diluted in PBS                                                         | 3 - 24 nmol        | - (plasma)           | <i>in vitro</i> | Amidolytic activity ↑ (e.g., ~10-fold faster conversion of substrate in presence of 12 nmol hematin) |    | Becker et al. 1985 [24]    |
| <b>Plasmin</b>     | Pig                 | Hematin | 0.25% Na <sub>2</sub> CO <sub>3</sub> (24h), diluted with barbital buffer (pH 7.4) | 0.006 - 0.09 μg/ml | -                    | <i>in vitro</i> | Amidolytic activity ↓ (6 - 50%; 1 min preincubation)                                                 |    | Green et al. 1983 [37]     |
| Plasmin            | Pig                 | Hematin | 0.25% Na <sub>2</sub> CO <sub>3</sub> (24h), diluted with barbital buffer (pH 7.4) | 15 μg/ml           | - (whole blood clot) | <i>in vitro</i> | Inhibition of clot lysis                                                                             |    | Green et al. 1983 [37]     |
| Plasmin            | Human               | Heme    | -                                                                                  | -                  | -                    | <i>in vitro</i> | Suggestion of a permanently bound heme                                                               | .                                                                                     | Arkebauer et al. 2011 [68] |
| <b>Plasminogen</b> | Human (AIP patient) | Hematin | N/A                                                                                | 4 mg/kg            | intravenous          | <i>in vivo</i>  | No change of plasma level                                                                            | -                                                                                     | Glueck et al. 1983 [23]    |
| <b>Protein C</b>   | Mouse (CLP)         | Hemin   | DMSO, diluted in PBS                                                               | 50 μmol/kg         | intraperitoneal      | <i>in vivo</i>  | Protein C plasma level ↑ (4 - 24 h after treatment)                                                  |   | Fei et al. 2012 [30]       |
| <b>P-selectin</b>  | Human               | Hemin   | N/A                                                                                | 10 μM              | - (HUVECs)           | <i>in vitro</i> | TLR-4-dependent surface P-selectin expression ↑                                                      |  | Belcher et al. 2011 [78]   |
| P-selectin         | Human               | Hemin   | 50 mM NaOH / 145 mM NaCl, diluted in medium                                        | 100 μM             | - (HUVECs)           | <i>in vitro</i> | Membrane P-selectin expression ↑                                                                     |  | Frimat et al. 2013 [79]    |
| P-selectin         | Human               | Hemin   | D-sorbitol, Na <sub>2</sub> CO <sub>3</sub> , saline                               | 20 μM              | - (HUVECs)           | <i>in vitro</i> | P-selectin expression ↑                                                                              |  | Belcher et al. 2014 [52]   |

|                 |                              |                                                             |                                                                                                       |                 |               |                 |                                                                                             |                                                                                       |                               |
|-----------------|------------------------------|-------------------------------------------------------------|-------------------------------------------------------------------------------------------------------|-----------------|---------------|-----------------|---------------------------------------------------------------------------------------------|---------------------------------------------------------------------------------------|-------------------------------|
| P-selectin      | Mouse<br>(C57BL/6,<br>NY1DD) | (as<br>Panhematin<br>®)<br>Hemin<br>(as<br>Panhematin<br>®) | (as<br>Panhematin®)<br>D-sorbitol,<br>Na <sub>2</sub> CO <sub>3</sub> , saline<br>(as<br>Panhematin®) | 3.2<br>µmol/kg  | intravenous   | <i>in vivo</i>  | P-selectin expression on vessel walls ↑, dependent on NOX, PKC and oxidants, TLR-4-mediated |    | Belcher et al. 2014 [52]      |
| P-selectin      | Mouse                        | Hemin                                                       | 0.1 N NaOH, 10 mM Tris base (pH 8.6)                                                                  | 750 µM          | intravenous   | <i>in vivo</i>  | Endothelial surface expression of P-selectin ↑ (one hour after administration)              |    | Wagener et al. 2001 [62]      |
| <b>Thrombin</b> | Human                        | Hematin                                                     | N/A                                                                                                   | 70 µg/ml        | - (plasma)    | <i>in vitro</i> | Time- and temperature-dependent prolongation of TT                                          |    | Glueck et al. 1983 [23]       |
| Thrombin        | Human                        | Hematin (4 weeks aged)                                      | carbonate buffer (pH 7.4)                                                                             | 6 µg/ml         | -             | <i>in vitro</i> | Inhibition of thrombin (0.25 U/ml)-mediated fibrinopeptide A generation                     |    | Jones et al. 1986 [80]        |
| Thrombin        | Bovine                       | Hematin                                                     | 0.25% Na <sub>2</sub> CO <sub>3</sub> (24h), diluted with barbital buffer (pH 7.4)                    | 50 µg/ml        | -             | <i>in vitro</i> | Hematin binding to thrombin (2 mg/ml),                                                      | -                                                                                     | Green et al. 1983 [37]        |
| Thrombin        | Human                        | Hematin                                                     | 0.25% Na <sub>2</sub> CO <sub>3</sub> (24h), diluted with barbital buffer (pH 7.4)                    | 0 - 0.238 µg/ml | -             | <i>in vitro</i> | amidolytic activity of α-thrombin (17.4 - 69.6 µU/ml) ↓ (by 13 - 86.3%)                     |    | Green et al. 1983 [37]        |
| Thrombin        | Mouse                        | Hemin                                                       | 0.1 M NaOH and 0.1 M Tris-HCl (pH 8.0)                                                                | 0 - 35 µmol/kg  | Retro-orbital | <i>in vivo</i>  | Thrombin-antithrombin complex plasma levels ↑ (up to 2.7-fold)                              |  | Sparkenbaugh et al. 2015 [72] |
| Thrombin        | Human                        | Hemin                                                       | 30 mM NaOH, diluted in HEPES buffer (pH 7.0)                                                          | 0 - 50 µM       | -             | <i>in vitro</i> | No impact on the amidolytic activity of α-thrombin (25 nM)                                  | -                                                                                     | Hopp et al. 2020 [32]         |

|                       |                 |       |                                        |                       |                 |                 |                                                                                                                                                                                              |                                                                                       |                               |
|-----------------------|-----------------|-------|----------------------------------------|-----------------------|-----------------|-----------------|----------------------------------------------------------------------------------------------------------------------------------------------------------------------------------------------|---------------------------------------------------------------------------------------|-------------------------------|
| <b>Thrombomodulin</b> | Mouse (CLP)     | Hemin | DMSO, diluted in PBS                   | 50 $\mu\text{mol/kg}$ | intraperitoneal | <i>in vivo</i>  | Thrombomodulin plasma level $\downarrow$ (4 - 24 h after treatment)                                                                                                                          |    | Fei et al. 2012 [30]          |
| <b>Tissue factor</b>  | Human           | Hemin | 0.05 M NaOH, diluted in medium         | 1 - 100 $\mu\text{M}$ | - (ECs)         | <i>in vitro</i> | Dose-dependent upregulation of TF expression $\uparrow$ (up to 50-fold with 100 $\mu\text{M}$ heme)                                                                                          |    | Setty et al. 2008 [81]        |
| Tissue factor         | Human           | Hemin | 0.05 M NaOH, diluted in medium         | 100 $\mu\text{M}$     | - (ECs)         | <i>in vitro</i> | Time-dependent upregulation of TF mRNA expression $\uparrow$ (17-fold), time-dependent upregulation of total endothelial TF protein level (after 4 hours; functionally active TF) $\uparrow$ |    | Setty et al. 2008 [81]        |
| Tissue factor         | Human           | Hemin | N/A                                    | 10 $\mu\text{M}$      | - (plasma)      | <i>in vitro</i> | TF level in PBMCs and monocytes $\uparrow$ , prevention by hemopexin (15 $\mu\text{M}$ ), TF mRNA expression in monocytes $\uparrow$                                                         |    | Rehani et al. 2013 [82]       |
| Tissue factor         | Human           | Hemin | N/A                                    | 30 $\mu\text{M}$      | - (plasma)      | <i>in vitro</i> | TF expression in PBMCs $\uparrow$                                                                                                                                                            |    | Souza et al. 2014 [83]        |
| Tissue factor         | Human/<br>Mouse | Hemin | 0.1 M NaOH and 0.1 M Tris-HCl (pH 8.0) | 5- 50 $\mu\text{M}$   | -               | <i>in vitro</i> | TF expression in PBMCs and RAW 264.7 macrophages $\uparrow$                                                                                                                                  |    | Sparkenbaugh et al. 2015 [72] |
| Tissue factor         | Mouse           | Hemin | 0.1 M NaOH and 0.1 M Tris-HCl (pH 8.0) | 35 $\mu\text{mol/kg}$ | Retro-orbital   | <i>in vivo</i>  | Blocking of intrinsic pathway did not influence heme-driven procoagulant activity $\rightarrow$ important role for extrinsic, TF-mediated pathway                                            |  | Sparkenbaugh et al. 2015 [72] |
| Tissue factor         | Human           | Hemin | 0.1 M NaOH, adjusted to pH 7.4         | 30 $\mu\text{M}$      | - (whole blood) | <i>ex vivo</i>  | TF antibody inhibited heme-induced coagulation                                                                                                                                               |  | De Souza et al. 2017 [34]     |

|                              |       |                                        |                                                                       |                  |                 |                 |                                                                                                                         |                                                                                       |                           |
|------------------------------|-------|----------------------------------------|-----------------------------------------------------------------------|------------------|-----------------|-----------------|-------------------------------------------------------------------------------------------------------------------------|---------------------------------------------------------------------------------------|---------------------------|
| Tissue factor                | Human | Hemin                                  | 0.1 M NaOH, diluted with water                                        | 5 - 30 $\mu$ M   | - (PBMCs)       | <i>in vitro</i> | → TF-dependency of heme's procoagulant effects<br>TF expression ( $\geq 10 \mu$ M hemin) $\uparrow$                     |    | Houkpe et al. 2020 [84]   |
| Tissue factor                | Mice  | Hemin                                  | 50 mM NaOH, 145 mM NaCl                                               | 100 $\mu$ mol/kg | intraperitoneal | <i>in vivo</i>  | TF expression $\uparrow$                                                                                                |    | May et al. 2020 [85]      |
| <b>VCAM-1</b>                | Human | Hemin                                  | N/A                                                                   | 100 $\mu$ M      | - (HUVECs)      | <i>in vitro</i> | Surface expression of VCAM-1 (3-fold) $\uparrow$                                                                        |    | Wagener et al. 1997 [69]  |
| VCAM-1                       | Mouse | Hemin                                  | 0.1 N NaOH, 10 mM Tris base (pH 8.6)                                  | 750 $\mu$ M      | intravenous     | <i>in vivo</i>  | Endothelial surface expression of VCAM-1 $\uparrow$ (1 - 24 hours after administration)                                 |    | Wagener et al. 2001 [62]  |
| <b>Von Willebrand factor</b> | Human | $^{59}$ Fe- and $^3$ H-labeled Hematin | 0.25% Na <sub>2</sub> CO <sub>3</sub>                                 | e.g. 0.17 mg/ml  | -               | <i>in vitro</i> | Formation of FVIII/VWF complex, inhibition of FVIII-VWF dissociation, binding of FVIII/VWF-hematin complex to platelets |    | Green et al. 1986 [70]    |
| Von Willebrand factor        | Human | Hemin                                  | N/A                                                                   | 10 $\mu$ M       | - (HUVECs)      | <i>in vitro</i> | Fast Weibel Palade body exocytosis $\uparrow$                                                                           |    | Belcher et al. 2011 [78]  |
| Von Willebrand factor        | Human | Hemin                                  | DMSO, diluted in buffer                                               | Molar excess     | -               | <i>in vitro</i> | Protection of FVIII from heme-mediated inactivation                                                                     | -                                                                                     | Repressé et al. 2012 [71] |
| Von Willebrand factor        | Human | Hemin                                  | 50 mM NaOH / 145 mM NaCl, diluted in medium                           | 100 $\mu$ M      | - (HUVECs)      | <i>in vitro</i> | Weibel Palade body exocytosis $\uparrow$ , time-dependent VWF secretion $\uparrow$ (up to ~65 ng/ml)                    |  | Frimat et al. 2013 [79]   |
| Von Willebrand factor        | Human | Hemin (as Panhematin®)                 | D-sorbitol, Na <sub>2</sub> CO <sub>3</sub> , saline (as Panhematin®) | 20 $\mu$ M       | - (HUVECs)      | <i>in vitro</i> | Superficial VWF string formation $\uparrow$ , prevented by hemopexin                                                    |  | Belcher et al. 2014 [52]  |

|                       |                        |                        |                                                                       |             |             |                |                                                                                      |                                                                                     |                          |
|-----------------------|------------------------|------------------------|-----------------------------------------------------------------------|-------------|-------------|----------------|--------------------------------------------------------------------------------------|-------------------------------------------------------------------------------------|--------------------------|
| Von Willebrand factor | Mouse (C57BL/6, NY1DD) | Hemin (as Panhematin®) | D-sorbitol, Na <sub>2</sub> CO <sub>3</sub> , saline (as Panhematin®) | 3.2 µmol/kg | intravenous | <i>in vivo</i> | VWF expression on vessel walls ↑, dependent on NOX, PKC and oxidants, TLR-4-mediated |  | Belcher et al. 2014 [52] |
|-----------------------|------------------------|------------------------|-----------------------------------------------------------------------|-------------|-------------|----------------|--------------------------------------------------------------------------------------|-------------------------------------------------------------------------------------|--------------------------|

♠ = Evidence for a tendency to an anticoagulant effect of heme and its formulations. ⚙ = Evidence for a tendency to a procoagulant effect of heme and its formulations. <sup>a</sup> = 10 min after hematin infusion. ECs = endothelial cells; HUVECs = human umbilical vein endothelial cells; ICAM-1 = intercellular adhesion molecule 1; N/A = not applicable; NOX = NADPH oxidase; pdAPC = plasma-derived activated protein C; PKC = protein kinase C; rAPC = recombinant activated protein C (Drotrecogin alpha, Xigris®) rFVIII = recombinant factor VIII; rFXIIIa = recombinant active factor XIII; TT = thrombin time; VCAM-1 = Vascular cell adhesion molecule 1.

## References

1. Brown, W.H. The relation of hematin to pathological pigment formation. *J. Exp. Med.* **1911**, *14*, 612–622.
2. Brown, W.H.; Loevenhart, A.S. The effect of hematin on the circulation and respiration. *J. Exp. Med.* **1913**, *18*, 107–112.
3. Brown, W.H. Malarial pigment (hematin) as an active factor in the production of the blood picture of malaria. *J. Exp. Med.* **1913**, *18*, 96–106.
4. Brown, W.H. The renal complications of hematin intoxication and their relation to Malaria. *Arch. Intern. Med.* **1913**, *XII*, 315–321.
5. Anderson, W.A.D.; Morrison, D.B.; Williams, E.F. Pathologic changes following injections of ferrihemate (hematin) in dogs. *Arch. Pathol.* **1942**, *33*, 589–602.
6. Corcoran, A.C.; Page, I.H. Renal damage from ferroheme pigments myoglobin, hemoglobin, hematin. *Tex. Rep. Biol. Med.* **1945**, *3*, 528–544.
7. Gessler, U.; Loreth, A.; Schröder, K.; Steinhausen, M. Experimentelle Untersuchungen über die glomeruläre Filtration anurischer Ratten nach Hämatinvergiftung. *Klin. Wochenschr.* **1966**, *44*, 628–633.
8. Dhar, G.J.; Bossenmaier, I.; Petryka, Z.J.; Cardinal, R.; Watson, C.J. Effect of hematin in hepatic porphyria: Further studies. *Ann. Intern. Med.* **1975**, *83*, 20–30.
9. Lips, D.L.; Pierach, C.A.; Edwards, P.S. Hematin toxicity in rats. *Toxicol. Lett.* **1978**, *2*, 329–332.
10. Lamon, J.M.; Frykholm, B.C.; Hess, R.A.; Tschudy, D.P. Hematin therapy for acute porphyria. *Medicine (Baltimore)*. **1979**, *58*, 252–269.
11. Morris, D.L.; Dudley, M.D.; Pearson, R.D. Coagulopathy associated with hematin treatment for acute intermittent porphyria. *Ann. Intern. Med.* **1981**, *95*, 700–701.
12. McColl, K.E.; Moore, M.R.; Thompson, G.G.; Goldberg, A. Treatment with haematin in acute hepatic porphyria. *Q. J. Med.* **1981**, *50*, 161–174.
13. Bloomer, J.R.; Pierach, C.A. Effect of hematin administration to patients with protoporphyria and liver disease. *Hepatology* **1982**, *2*, 817–821.
14. Mustajoki, P.; Tenhunen, R.; Tokola, O.; Gothoni, G. Haem arginate in the treatment of acute hepatic porphyrias. *Br. Med. J. (Clin. Res. Ed.)* **1986**, *293*, 538–539.

15. Ruutu, T.; Volin, L.; Tenhunen, R. Haem arginate as a treatment for myelodysplastic syndromes. *Br. J. Haematol.* **1987**, *65*, 425–428.
16. Tenhunen, R.; Tokola, O.; Lindén, I.-B. Haem arginate: A new stable haem compound. *J. Pharm. Pharmacol.* **1987**, *39*, 780–786.
17. Simionatto, C.S.; Cabal, R.; Jones, R.L.; Galbraith, R.A. Thrombophlebitis and disturbed hemostasis following administration of intravenous hematin in normal volunteers. *Am. J. Med.* **1988**, *85*, 538–540.
18. Herrick, A.L.; Moore, M.R.; Mccoll, K.E.L.; Cook, A.; Goldberg, A. Controlled trial of haem arginate in acute hepatic porphyria. *Lancet* **1989**, *333*, 1295–1297.
19. Mustajoki, P.; Nordmann, Y. Early administration of heme arginate for acute porphyric attacks. *Arch. Intern Med.* **1993**, *153*, 2004–2008.
20. Gajra, A.; Vajpayee, N.; Singh, M.; Coyle, T.E.; Wright, J. Hematin induced coagulopathy in acute intermittent porphyria: A case report. *Blood* **2000**, *96*, 82b.
21. Anderson, K.E.; Collins, S. Open-label study of hemin for acute porphyria: Clinical practice implications. *Am. J. Med.* **2006**, *119*, 801.e1-801.e6.
22. Marsden, J.T.; Guppy, S.; Stein, P.; Cox, T.M.; Badminton, M.; Gardiner, T.; Barth, J.H.; Stewart, M.F.; Rees, D.C. Audit of the use of regular haem arginate infusions in patients with acute porphyria to prevent recurrent symptoms. *JIMD Rep.* **2015**, *22*, 57–65.
23. Glueck, R.; Green, D.; Cohen, I.; Ts'ao, C. Hematin: Unique effects on hemostasis. *Blood* **1983**, *61*, 243–249.
24. Becker, C.G.; Wagner, M.; Kaplan, A.P.; Silverberg, M.; Grady, R.W.; Liem, H.; Muller-Eberhard, U. Activation of factor XII-dependent pathways in human plasma by hematin and protoporphyrin. *J. Clin. Invest.* **1985**, *76*, 413–419.
25. Jones, R.L. Hematin-derived anticoagulant. Generation in vitro and in vivo. *J. Exp. Med.* **1986**, *163*, 724–739.
26. Volin, L.; Rasi, V.; Vahtera, E.; Tenhunen, R. Heme arginate: effects on hemostasis. *Blood* **1988**, *71*, 625–628.
27. Green, D.; Ts'ao, C. Hematin: Effects on hemostasis. *J. Lab. Clin. Med.* **1990**, *115*, 144–147.
28. Huang, Y.; Komatsu, T.; Nakagawa, A.; Tsuchida, E.; Kobayashi, S. Compatibility in vitro of albumin-heme (O<sub>2</sub> carrier) with blood cell components. *J. Biomed. Mater. Res.* **2003**, *66A*, 292–297.
29. Desbuards, N.; Rochefort, G.Y.; Schlecht, D.; Machet, M.-C.; Halimi, J.-M.; Eder, V.; Hyvelin, J.-M.; Antier, D. Heme oxygenase-1 inducer hemin prevents vascular thrombosis. *Thromb. Haemost.* **2007**, *98*, 614–620.
30. Fei, D.; Meng, X.; Zhao, M.M.; Kang, K.A.I.; Tan, G.; Pan, S.; Luo, Y.; Liu, W.E.N.; Nan, C.; Jiang, H.; et al. Enhanced induction of heme oxygenase-1 suppresses thrombus formation and affects the protein C system in sepsis. *Transl. Res.* **2012**, *159*, 99–109.
31. Hassaan, P.S.; Mehanna, R.A.; Dief, A.E. The potential role of hemopexin and heme oxygenase-1 inducer in a model of sepsis. *Physiol. J.* **2015**, *2015*, 1–10.
32. Hopp, M.-T.; Alhanafi, N.; Paul George, A.A.; Hamedani, N.S.; Biswas, A.; Oldenburg, J.; Pötzsch, B.; Imhof, D. Molecular insights and functional consequences of the interaction of heme with activated protein C. *Antioxid. Redox Signal.* **2021**, *34*, 32–48.
33. Rochefort, G.Y.; Libgot, R.; Desbuards, N.; Schlecht, D.; Halimi, J.M.; Ossant, F.; Eder, V.; Antier, D. Effect of the heme oxygenase inducer hemin on blood haemostasis measured by high-frequency ultrasound. *Clin. Exp. Pharmacol. Physiol.* **2007**, *34*, 1272–1275.



34. De Souza, G.R.; Hounkpe, B.W.; Fiusa, M.M.L.; Colella, M.P.; Annichino-Bizzacchi, J.M.; Traina, F.; Costa, F.F.; De Paula, E.V. Tissue factor-dependent coagulation activation by heme: A thromboelastometry study. *PLoS One* **2017**, *12*, 1–10.
35. Goetsch, C.A.; Bissell, D.M. Instability of hematin used in the treatment of acute hepatic porphyria. *N. Engl. J. Med.* **1986**, *315*, 235–238.
36. Barnard, R.D. The effect of saccharin ingestion on blood coagulation and the in vitro anticoagulant effect of saccharin and of ferriheme. *J. Am. Pharm. Assoc. (Scientific ed.)* **1947**, *36*, 225–228.
37. Green, D.; Reynolds, N.; Klein, J.; Kohl, H.; Ts'ao, C.H. The inactivation of hemostatic factors by hematin. *J. Lab. Clin. Med.* **1983**, *102*, 361–9.
38. Peterson, D.; Gerrard, J.; Glover, S.; Rao, G.; White, J. Epinephrine reduction of heme: Implication for understanding the transmission of an agonist stimulus. *Science (80-. )*. **1982**, *215*, 71–73.
39. Malik, Z.; Creter, D.; Cohen, A.; Djaldetti, M. Haemin affects platelet aggregation and lymphocyte mitogenicity in whole blood incubations. *Cytobios* **1983**, *38*, 33–38.
40. Neely, S.M.; Gardner, D.; Reynolds, N.; Green, D.; Ts'ao, C. Mechanism and characteristics of platelet activation by haematin. *Br. J. Haematol.* **1984**, *58*, 305–316.
41. Volin, L.; Ruutu, T.; Knuutila, S.; Tenhunen, R. Heme arginate treatment for myelodysplastic syndromes. *Leuk. Res.* **1988**, *12*, 423–431.
42. Peng, L.; Mundada, L.; Stomel, J.M.; Liu, J.J.; Sun, J.; Yet, S.-F.; Fay, W.P. Induction of heme oxygenase-1 expression inhibits platelet-dependent thrombosis. *Antioxid. Redox Signal.* **2004**, *6*, 729–735.
43. Komatsu, T.; Huang, Y.; Wakamoto, S.; Abe, H.; Fujihara, M.; Azuma, H.; Ikeda, H.; Yamamoto, H.; Horinouchi, H.; Kobayashi, K.; et al. Influence of O<sub>2</sub>-carrying plasma hemoprotein “albumin-heme” on complement system and platelet activation in vitro and physiological responses to exchange transfusion. *J. Biomed. Mater. Res. Part A* **2007**, *81A*, 821–826.
44. Woollard, K.J.; Sturgeon, S.; Chin-Dusting, J.P.F.; Salem, H.H.; Jackson, S.P. Erythrocyte hemolysis and hemoglobin oxidation promote ferric chloride-induced vascular injury. *J. Biol. Chem.* **2009**, *284*, 13110–13118.
45. NaveenKumar, S.K.; SharathBabu, B.N.; Hemshekhar, M.; Kemparaju, K.; Girish, K.S.; Muges, G. The role of reactive oxygen species and ferroptosis in heme-mediated activation of human platelets. *ACS Chem. Biol.* **2018**, *13*, 1996–2002.
46. NaveenKumar, S.K.; Hemshekhar, M.; Kemparaju, K.; Girish, K.S. Hemin-induced platelet activation and ferroptosis is mediated through ROS-driven proteasomal activity and inflammasome activation: Protection by melatonin. *Biochim. Biophys. Acta - Mol. Basis Dis.* **2019**, *1865*, 2303–2316.
47. Bourne, J.H.; Colicchia, M.; Di, Y.; Martin, E.; Slater, A.; Roumenina, L.T.; Dimitrov, J.D.; Watson, S.P.; Rayes, J. Heme induces human and mouse platelet activation through C-type-lectin-like receptor-2. *Haematologica* **2020**.
48. Neely, S.M.; Gardner, D. V.; Green, D.; Ts'ao, C.H. Effect of hematin on endothelial cells and endothelial cell-platelet interactions. *Am. J. Pathol.* **1984**, *115*, 390–396.
49. Balla, G.; Vercollotti, G.; Muller-Eberhard, U.; Eaton, J.; Jacob, H.S.; Vercollotti, G.M.; Muller-Eberhard, U.; Eaton, J.; Jacob, H.S. Exposure of endothelial cells to free heme potentiates damage mediated by granulocytes and toxic oxygen species. *Lab. Investig.* **1991**, *64*, 648–655.

50. Balla, G.; Jacob, H.S.; Eaton, J.W.; Belcher, J.D.; Vercellotti, G.M. Hemin: A possible physiological mediator of low density lipoprotein oxidation and endothelial injury. *Arterioscler. Thromb. A J. Vasc. Biol.* **1991**, *11*, 1700–1711.
51. Higdon, A.N.; Benavides, G.A.; Chacko, B.K.; Ouyang, X.; Johnson, M.S.; Landar, A.; Zhang, J.; Darley-Usmar, V.M. Hemin causes mitochondrial dysfunction in endothelial cells through promoting lipid peroxidation: The protective role of autophagy. *Am. J. Physiol. Circ. Physiol.* **2012**, *302*, H1394–H1409.
52. Belcher, J.D.; Chen, C.; Nguyen, J.; Milbauer, L.; Abdulla, F.; Alayash, A.I.; Smith, A.; Nath, K.A.; Hebbel, R.P.; Vercellotti, G.M.; et al. Heme triggers TLR4 signaling leading to endothelial cell activation and vaso-occlusion in murine sickle cell disease. *Blood* **2014**, *123*, 377–390.
53. Camus, S.M.; De Moraes, J.A.; Bonnin, P.; Abbyad, P.; Le Jeune, S.; Lionnet, F.; Loufrani, L.; Grimaud, L.; Lambry, J.-C.; Charue, D.; et al. Circulating cell membrane microparticles transfer heme to endothelial cells and trigger vasoocclusions in sickle cell disease. *Blood* **2015**, *125*, 3805–3814.
54. Singla, S.; Sysol, J.R.; Dille, B.; Jones, N.; Chen, J.; Machado, R.F. Hemin causes lung microvascular endothelial barrier dysfunction by necroptotic cell death. *Am. J. Respir. Cell Mol. Biol.* **2017**, *57*, 307–314.
55. May, O.; Merle, N.S.; Grunenwald, A.; Gnemmi, V.; Leon, J.; Payet, C.; Robe-Rybkin, T.; Paule, R.; Delguste, F.; Satchell, S.C.; et al. Heme drives susceptibility of glomerular endothelium to complement overactivation due to inefficient upregulation of heme oxygenase-1. *Front. Immunol.* **2018**, *9*, 3008.
56. Merle, N.S.; Grunenwald, A.; Rajaratnam, H.; Gnemmi, V.; Frimat, M.; Figueres, M.L.; Knockaert, S.; Bouzekri, S.; Charue, D.; Noe, R.; et al. Intravascular hemolysis activates complement via cell-free heme and heme-loaded microvesicles. *JCI insight* **2018**.
57. Kucukal, E.; Ilich, A.; Key, N.S.; Little, J.A.; Gurkan, U.A. Red blood cell adhesion to heme-activated endothelial cells reflects clinical phenotype in sickle cell disease. *Am. J. Hematol.* **2018**, *93*, 1050–1060.
58. Chou, A.C.; Fitch, C.D. Mechanism of hemolysis induced by ferriprotoporphyrin IX. *J. Clin. Invest.* **1981**, *68*, 672–677.
59. Liu, S.C.; Zhai, S.; Lawler, J.; Palek, J. Hemin-mediated dissociation of erythrocyte membrane skeletal proteins. *J. Biol. Chem.* **1985**, *260*, 12234–9.
60. Shaklai, N.; Shviro, Y.; Rabizadeh, E.; Kirschner-Zilber, I. Accumulation and drainage of hemin in the red cell membrane. *Biochim. Biophys. Acta - Biomembr.* **1985**, *821*, 355–366.
61. Smith, D.J.; Winslow, R.M. Effects of extraerythrocytic hemoglobin and its components on mononuclear cell procoagulant activity. *J. Lab. Clin. Med.* **1992**, *119*, 176–182.
62. Wagener, F.A.D.T.G.; Eggert, A.; Boerman, O.C.; Oyen, W.J.G.; Verhofstad, A.; Abraham, N.G.; Adema, G.; Van Kooyk, Y.; De Witte, T.; Figdor, C.G. Heme is a potent inducer of inflammation in mice and is counteracted by heme oxygenase. *Blood* **2001**, *98*, 1802–1811.
63. Graça-Souza, A. V.; Arruda, M.A.B.; De Freitas, M.S.; Barja-Fidalgo, C.; Oliveira, P.L. Neutrophil activation by heme: Implications for inflammatory processes. *Blood* **2002**, *99*, 4160–4165.
64. Wagener, F.A.D.T.G.; van Beurden, H.E.; von den Hoff, J.W.; Adema, G.J.; Figdor, C.G. The heme-heme oxygenase system: A molecular switch in wound healing. *Blood* **2003**, *102*, 521–528.

65. Arruda, M.A.; Rossi, A.G.; de Freitas, M.S.; Barja-Fidalgo, C.; Graça-Souza, A. V. Heme inhibits human neutrophil apoptosis: Involvement of phosphoinositide 3-kinase, MAPK, and NF- $\kappa$ B. *J. Immunol.* **2004**, *173*, 2023–2030.
66. Chen, G.; Zhang, D.; Fuchs, T.A.; Manwani, D.; Wagner, D.D.; Frenette, P.S. Heme-induced neutrophil extracellular traps contribute to the pathogenesis of sickle cell disease. *Blood* **2014**, *123*, 3818–3827.
67. Ohbuchi, A.; Kono, M.; Kitagawa, K.; Takenokuchi, M.; Imoto, S.; Saigo, K. Quantitative analysis of hemin-induced neutrophil extracellular trap formation and effects of hydrogen peroxide on this phenomenon. *Biochem. Biophys. Reports* **2017**, *11*, 147–153.
68. Arkebauer, M.R.; Kanaparthi, S.S.; Malayaman, S.N.; Vosseller, K.; Nielsen, V.G. Carbon monoxide and nitric oxide modulate  $\alpha$ 2-antiplasmin and plasmin activity. *Blood Coagul. Fibrinolysis* **2011**, *22*, 712–719.
69. Vijayan, V.; Wagener, F.A.D.T.G.; Immenschuh, S. The macrophage heme-heme oxygenase-1 system and its role in inflammation. *Biochem. Pharmacol.* **2018**, *153*, 159–167.
70. Green, D.; Furby, F.H.; Berndt, M.C. The interaction of the VIII/von Willebrand factor complex with hematin. *Thromb. Haemost.* **1986**, *56*, 277–282.
71. Repessé, Y.; Dimitrov, J.D.; Peyron, I.; Moshai, E.F.; Kiger, L.; Dasgupta, S.; Delignat, S.; Marden, M.C.; Kaveri, S. V.; Lacroix-Desmazes, S. Heme binds to factor VIII and inhibits its interaction with activated factor IX. *J. Thromb. Haemost.* **2012**, *10*, 1062–1071.
72. Sparkenbaugh, E.M.; Chantrathammachart, P.; Wang, S.; Jonas, W.; Kirchofer, D.; Gailani, D.; Gruber, A.; Kasthuri, R.; Key, N.S.; Mackman, N.; et al. Excess of heme induces tissue factor-dependent activation of coagulation in mice. *Haematologica* **2015**, *100*, 308–313.
73. Nielsen, V.G.; Cohen, J.B.; Malayaman, S.N.; Nowak, M.; Vosseller, K. Fibrinogen is a heme-associated, carbon monoxide sensing molecule: A preliminary report. *Blood Coagul. Fibrinolysis* **2011**, *22*, 443–447.
74. Orino, K. Functional binding analysis of human fibrinogen as an iron- and heme-binding protein. *BioMetals* **2013**, *26*, 789–794.
75. Ke, Z.; Huang, Q. Haem-assisted dityrosine-cross-linking of fibrinogen under non-thermal plasma exposure: One important mechanism of facilitated blood coagulation. *Sci. Rep.* **2016**, *6*, 1–8.
76. Hou, T.; Zhang, Y.; Wu, T.; Wang, M.; Zhang, Y.; Li, R.; Wang, L.; Xue, Q.; Wang, S. Label-free detection of fibrinogen based on fibrinogen-enhanced peroxidase activity of fibrinogen-hemin composite. *Analyst* **2018**, *143*, 725–730.
77. Musser, D.A.; Wagner, J.M.; Weber, F.J.; Datta-Gupta, N. The binding of tumor localizing porphyrins to a fibrin matrix and their effects following photoirradiation. *Res. Commun. Chem. Pathol. Pharmacol.* **1980**, *28*, 505–25.
78. Belcher, J.D.; Nguyen, J.; Chen, C.; Smith, A.; Alayash, A.I.; Nair, S.L.; Somani, A.; Hebbel, R.P.; Vercellotti, G.M. Plasma hemoglobin and heme trigger Weibel Palade body exocytosis and vaso-occlusion in transgenic sickle mice. *Blood* **2011**, *118*, 896–896.
79. Frimat, M.; Tabarin, F.; Dimitrov, J.D.; Poitou, C.; Halbwachs-Mecarelli, L.; Fremeaux-Bacchi, V.; Roumenina, L.T. Complement activation by heme as a secondary hit for atypical hemolytic uremic syndrome. *Blood* **2013**, *122*, 282–292.

80. Jones, R.L. Hematin-derived anticoagulant retards fibrin formation and is inhibited by iron chelators. *Ann. New York Acad. Sci.* **1986**, *485*, 418–420.
81. Setty, B.N.Y.; Betal, S.G.; Zhang, J.; Stuart, M.J. Heme induces endothelial tissue factor expression: Potential role in hemostatic activation in patients with hemolytic anemia. *J. Thromb. Haemost.* **2008**, *6*, 2202–2209.
82. Rehani, T.; Mathson, K.; Belcher, J.D.; Vercellotti, G.M.; Slungaard, A. Heme potently stimulates tissue factor expression by peripheral blood monocytes: A novel mechanism for thrombosis in intravascular hemolytic diseases. *Blood* **2013**, *122*, 2215.
83. Souza, G.R.; Fiusa, M.M.L.; Lanaro, C.; Colella, M.P.; Montalvao, S.A.L.; Saad, S.T.O.; Costa, F.F.; Traina, F.; Annichino-Bizzacchi, J.M.; De Paula, E.V. Coagulation activation by heme: Evidence from global hemostasis assays. *Blood* **2014**, *124*, 455–455.
84. Hounkpe, B.W.; Moraes, C.R.P.; do Santos, M.N.N.; Costas, F.F.; De Paula, E. V. Heme induces mRNA expression and activation of tissue factor by TLR4 dependent mechanisms. *medRxiv* **2020**.
85. May, O.; Yatime, L.; Merle, N.S.; Delguste, F.; Howsam, M.; Daugan, M. V.; Paul-Constant, C.; Billamboz, M.; Ghinet, A.; Lancel, S.; et al. The receptor for advanced glycation end products is a sensor for cell-free heme. *FEBS J.* **2020**.
